# Supplementary material for: The fcc structure isomerization in gold nanoclusters
Source: Royal Society of Chemistry journal article supplement (doi:10.1039/c7nr05239a), 2017-01-01
Supplement: c7nr05239a1.pdf [file c7nr05239a1.pdf]

---

## Supporting Information

### The fcc structure isomerization in gold nanoclusters

Shengli Zhuang<sup>+, a, b</sup>, Lingwen Liao<sup>+, a</sup>, Man-Bo Li<sup>a</sup>, Chuanhao Yao<sup>a</sup>, Yan Zhao<sup>a, b</sup>, Hongwei Dong<sup>a, b</sup>, Jin Li<sup>c</sup>, Haiteng Deng<sup>d</sup>, Lingling Li<sup>e</sup>, and Zhikun Wu<sup>\*, a</sup>

<sup>a</sup> Key Laboratory of Materials Physics, Anhui Key Laboratory of Nanomaterials and Nanotechnology, CAS Center for Excellence in Nanoscience, Institute of Solid State Physics, Chinese Academy of Sciences, Hefei, Anhui 230031, China

E-mail: zkwu@issp.ac.cn

<sup>b</sup> Department of Chemistry, University of Science and Technology of China, Hefei, Anhui 230026, China

<sup>c</sup> Tsinghua University-Peking University Joint Center for Life Sciences, School of Life Sciences, Tsinghua University, Beijing 100084, China

<sup>d</sup> MOE Key Laboratory of Bioinformatics, School of Life Sciences, Tsinghua University, Beijing 100084, China

<sup>e</sup> Instrumental Analysis Center, Shanghai Jiaotong University, Shanghai 200240, China

<sup>+</sup> S. Zhuang and L. Liao contributed equally to this work.

## 1. Experimental

### 1.1 Chemicals.

All chemicals are commercially available and used as received. Tetrachloroauric(III) acid ( $\text{HAuCl}_4 \cdot 4\text{H}_2\text{O}$ , >99.99% metals basis, Sigma-Aldrich), tetraoctylammonium bromide (TOAB,  $\geq 98\%$ , Aladdin), phenylethylthiol (PET, 99%, Sigma-Aldrich), 4-tert-butylbenzenethiol (TBBTH, 97%, Sigma-Aldrich), sodium borohydride ( $\text{NaBH}_4$ , Sigma-Aldrich). Solvents: tetrahydrofuran (THF, 99.0%), ethanol (AR, 99.7%), methanol ( $\text{CH}_3\text{OH}$ , 99.5%), toluene ( $\text{C}_7\text{H}_8$ , 99.5%), dichloromethane ( $\text{CH}_2\text{Cl}_2$ , 99.0%), petroleum ether (AR), hydrochloric acid (AR, 36.0%~38.0%), nitric acid (AR, 65%~68%) and acetic acid (AR, 99.50%) were purchased from Sinopharm chemical reagent co., ltd. The water used in all experiments was ultrapure (resistivity 18.2  $\text{M}\Omega$  cm), produced by a Milli-Q NANO pure water system.

### 1.2 Synthesis of $\text{Au}_{52}(\text{PET})_{32}$ .

Tetraoctylammonium bromide (TOAB, 200 mg) was dissolved in 15 mL of THF in a tri-neck flask, and then  $\text{HAuCl}_4 \cdot 4\text{H}_2\text{O}$  (100 mg, 0.243 mmol) and 75  $\mu\text{L}$  of nitric acid (4.6 equivs./mol of Au) dissolved in 75  $\mu\text{L}$  of water were added into the solution. After the solution was stirred for 15 min, 400  $\mu\text{L}$  of phenylethylthiol (12.2 equivs./mol of Au) was added. The solution was kept under constant stirring (900 rpm) until the colour of the solution changed from deep red to colorless over a duration of 3 h, and then a freshly made cold aqueous solution of  $\text{NaBH}_4$  (130 mg, 14.1 equivs./mol of Au) was added at one time. The growth of gold nanoclusters was allowed to proceed for overnight (~15 h). After removal of the indissolvable, the solution was concentrated

and cold water was added, the precipitates were collected and thoroughly washed with methanol, then the Au<sub>52</sub>(PET)<sub>32</sub> nanoclusters were isolated from the crude by PTLC (CH<sub>2</sub>Cl<sub>2</sub>–petroleum ether as developing solvent) in a yield of ~0.5% (on basis of gold atoms). It should be noted that the whole process (including the reaction, post-treatment and isolation by PTLC) was facily conducted at room temperature without the avoidance of light and air.

Syntheses of Au<sub>52</sub>(PET)<sub>32</sub> nanoclusters with the other two acids are similar to the above synthesis method except that 75 μL nitric acid dissolved in 75 μL water is replaced by 150 μL hydrochloric acid (7.4 equivs./mol of Au) dissolved in 240 μL water or 150 μL acetic acid (10.8 equivs./mol of Au) dissolved in 150 μL water.

Synthesis of Au<sub>52</sub>(TBB)<sub>32</sub> nanocluster was referred to the previous work<sup>1</sup>.

### 1.3 Characterization.

Electrospray ionization (ESI) mass spectra were collected on a Waters Q-TOF mass spectrometer using a Z-spray source. The source temperature was kept at 70 °C. The spray voltage was adjusted to 2.20 kV and the cone voltage was kept at 60 V. The sample was prepared by dissolving the nanoclusters in toluene (~0.5 mg/mL) and then diluted (2:1 v/v) with methanol solution which contains 50 mM CsOAc. The prepared sample was directly infused into the chamber at 5 μL/min. UV2600 spectrophotometer was employed to record all the UV/vis/NIR absorption spectra in the range of 190-900 nm at room temperature in dichloromethane. The single-crystal X-ray diffraction data were collected on a Bruker D8 VENTURE CMOS photon 100 diffractometer with helios mx multilayer monochrmator Cu Kα radiation (λ = 1.54178 Å).

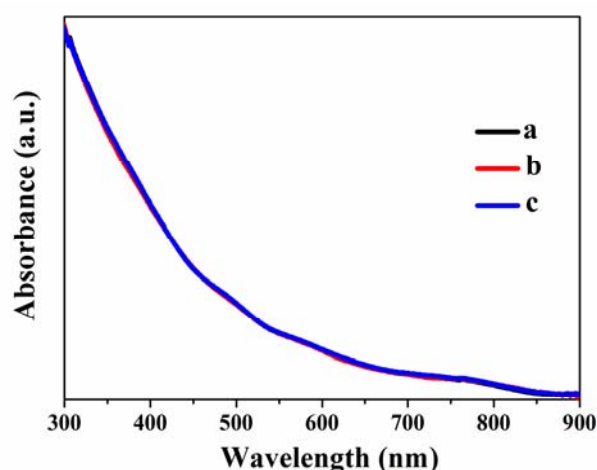

**Figure S1.** UV/vis/NIR optical spectrum of the major product when various acid was used: a) nitric acid, b) hydrochloric acid, and c) acetic acid.

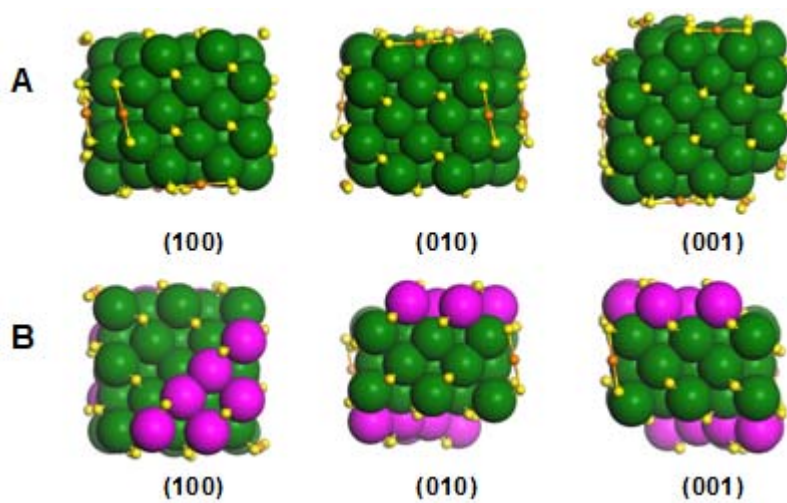

**Figure S2.** Binding and patterning structures of thiolates on the {100} facets: (A)  $\text{Au}_{92}(\text{TBBT})_{44}$ ; (B)  $\text{Au}_{52}(\text{PET})_{32}$ .

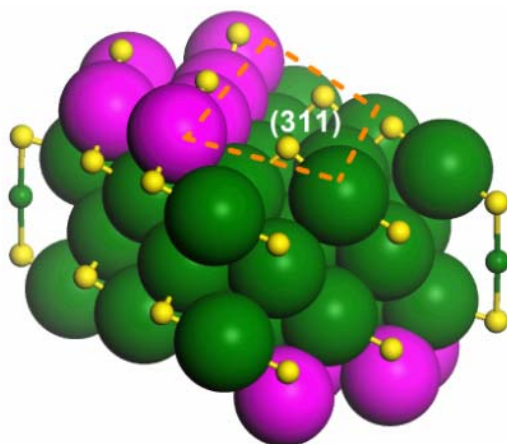

**Figure S3.** The fragment (311) facets in the  $\text{Au}_{52}(\text{PET})_{32}$  nanoclusters.

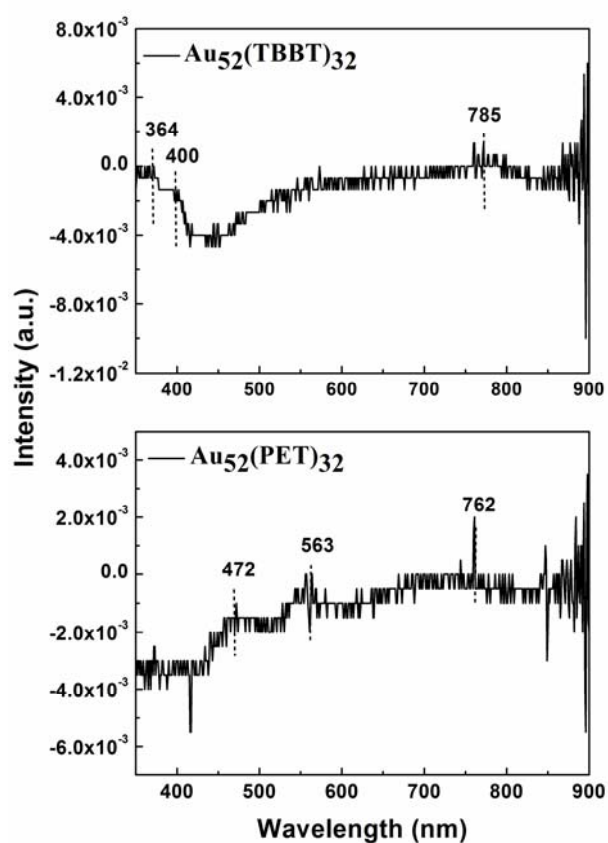

**Figure S4.** The first derivatives of UV/vis/NIR absorption spectra of  $\text{Au}_{52}(\text{PET})_{32}$  and  $\text{Au}_{52}(\text{TBBT})_{32}$ .

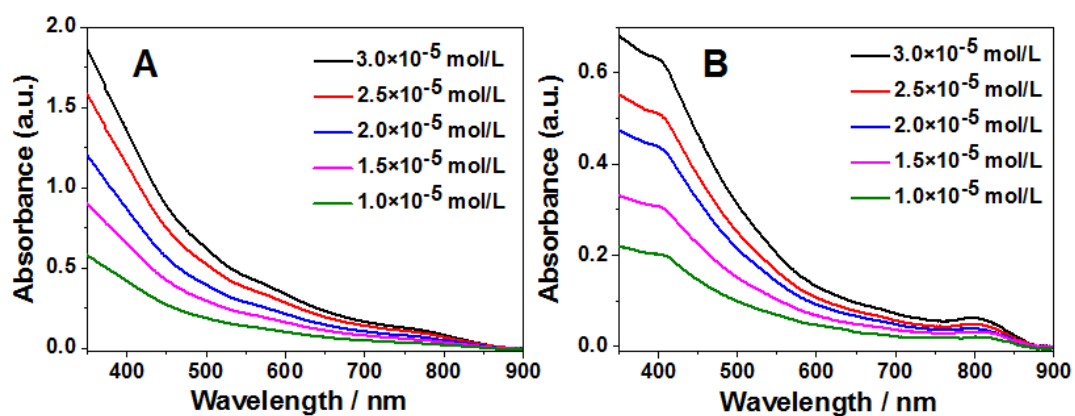

**Figure S5.** The UV/vis/NIR absorption spectra of the two  $\text{Au}_{52}(\text{SR})_{32}$  in different concentrations: (A)  $\text{Au}_{52}(\text{PET})_{32}$ ; (B)  $\text{Au}_{52}(\text{TBBT})_{32}$ .

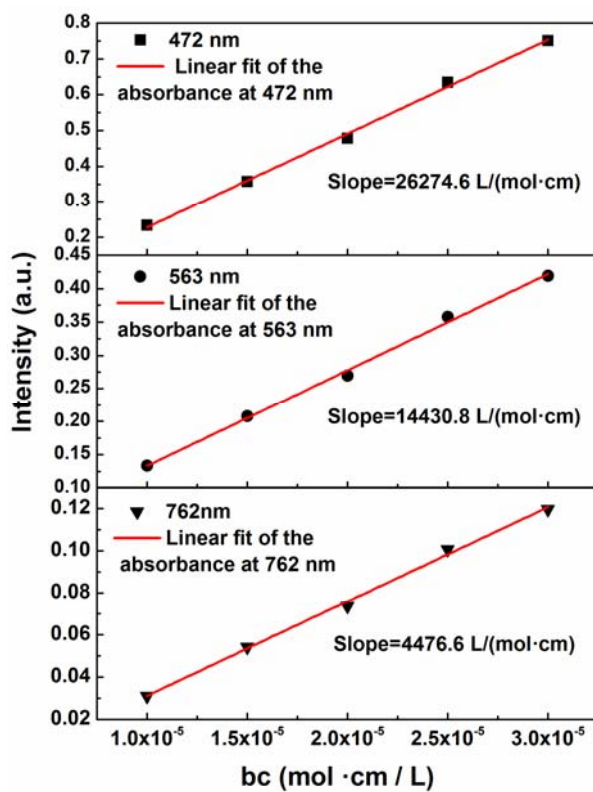

**Figure S6.** The extinction coefficients of  $Au_{52}(PET)_{32}$  at 472, 563 and 762 nm.

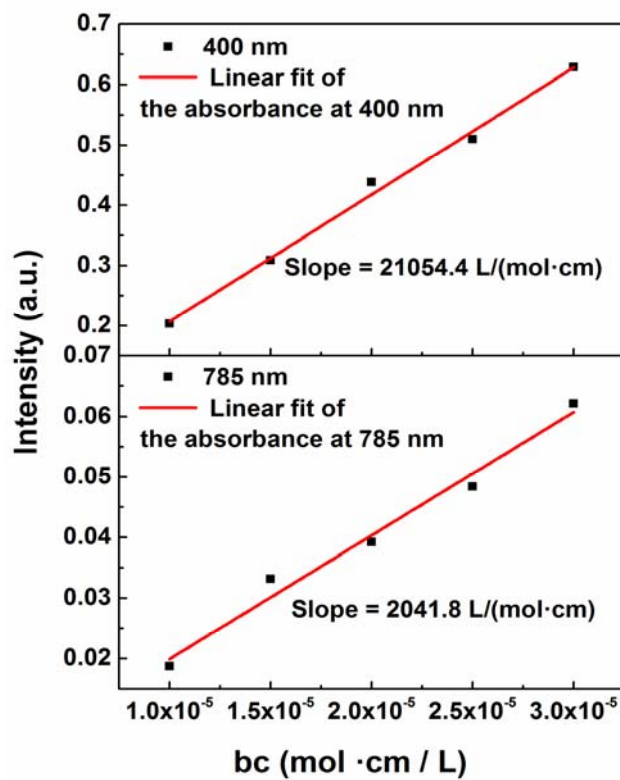

**Figure S7.** The extinction coefficients of  $Au_{52}(TBBT)_{32}$  at 400 and 785 nm.

---

#### 1.4 Reference

1. C. Zeng, Y. Chen, C. Liu, K. Nobusada, N. L. Rosi and R. Jin, *Sci. Adv.*, 2015, 1, e1500425.

---

## 2. Single crystal data of Au<sub>52</sub>(PET)<sub>32</sub>

Table 1. Crystal data and structure refinement for Au<sub>52</sub>(PET)<sub>32</sub>.

Identification code Au<sub>52</sub>(PET)<sub>32</sub>

|                                   |                                                                                                                                                                       |
|-----------------------------------|-----------------------------------------------------------------------------------------------------------------------------------------------------------------------|
| Empirical formula                 | C <sub>256</sub> H <sub>288</sub> Au <sub>52</sub> S <sub>32</sub>                                                                                                    |
| Formula weight                    | 14633.03                                                                                                                                                              |
| Temperature                       | 173.0 K                                                                                                                                                               |
| Wavelength                        | 1.54178 Å                                                                                                                                                             |
| Crystal system                    | Triclinic                                                                                                                                                             |
| Space group                       | P -1                                                                                                                                                                  |
| Unit cell dimensions              | a = 19.2220(8) Å                      α = 116.588(2)°<br>b = 19.8976(8) Å                      β = 95.458(2)°<br>c = 21.4243(9) Å                      γ = 95.019(2)° |
| Volume                            | 7216.1(5) Å <sup>3</sup>                                                                                                                                              |
| Z                                 | 1                                                                                                                                                                     |
| Density (calculated)              | 3.367 Mg/m <sup>3</sup>                                                                                                                                               |
| Absorption coefficient            | 50.734 mm <sup>-1</sup>                                                                                                                                               |
| F(000)                            | 6444                                                                                                                                                                  |
| Crystal size                      | 0.15x 0.13 x 0.12 mm <sup>3</sup>                                                                                                                                     |
| Theta range for data collection   | 2.333 to 68.561°.                                                                                                                                                     |
| Index ranges                      | -21 ≤ h ≤ 23, -23 ≤ k ≤ 23, -25 ≤ l ≤ 25                                                                                                                              |
| Reflections collected             | 96113                                                                                                                                                                 |
| Independent reflections           | 24899 [R(int) = 0.0804]                                                                                                                                               |
| Completeness to theta = 67.679°   | 94.0 %                                                                                                                                                                |
| Absorption correction             | Semi-empirical from equivalents                                                                                                                                       |
| Max. and min. transmission        | 0.1665 and 0.0411                                                                                                                                                     |
| Refinement method                 | Full-matrix-block least-squares on F <sup>2</sup>                                                                                                                     |
| Data / restraints / parameters    | 24899 / 1747 / 1339                                                                                                                                                   |
| Goodness-of-fit on F <sup>2</sup> | 1.458                                                                                                                                                                 |
| Final R indices [I > 2σ(I)]       | R1 = 0.1352, wR2 = 0.3636                                                                                                                                             |
| R indices (all data)              | R1 = 0.1836, wR2 = 0.4084                                                                                                                                             |
| Extinction coefficient            | n/a                                                                                                                                                                   |
| Largest diff. peak and hole       | 11.313 and -5.684 e.Å <sup>-3</sup>                                                                                                                                   |

Table 2. Atomic coordinates ( $\times 10^4$ ) and equivalent isotropic displacement parameters ( $\text{\AA}^2 \times 10^3$ ) for  $\text{Au}_{52}(\text{PET})_{32}$ .  $U(\text{eq})$  is defined as one third of the trace of the orthogonalized  $U^{ij}$  tensor.

|        | x    | y    | z    | U(eq)  |
|--------|------|------|------|--------|
| Au(1)  | 3992 | 3605 | 3405 | 46(1)  |
| Au(2)  | 3005 | 3213 | 4248 | 53(1)  |
| Au(3)  | 4238 | 2488 | 3784 | 57(1)  |
| Au(4)  | 5121 | 2838 | 3036 | 54(1)  |
| Au(5)  | 4961 | 4036 | 2592 | 56(1)  |
| Au(6)  | 3646 | 4643 | 2912 | 60(1)  |
| Au(7)  | 2750 | 4245 | 3640 | 56(1)  |
| Au(8)  | 3912 | 4662 | 4879 | 40(1)  |
| Au(9)  | 4920 | 5067 | 4041 | 41(1)  |
| Au(10) | 4547 | 6219 | 3446 | 74(1)  |
| Au(11) | 3739 | 5753 | 4453 | 51(1)  |
| Au(12) | 2498 | 5403 | 5091 | 60(1)  |
| Au(13) | 3899 | 5741 | 6403 | 47(1)  |
| Au(14) | 4862 | 6085 | 5511 | 40(1)  |
| Au(15) | 5885 | 6533 | 4726 | 50(1)  |
| Au(16) | 7013 | 5749 | 4374 | 55(1)  |
| Au(17) | 7136 | 4591 | 2686 | 72(1)  |
| Au(18) | 6174 | 2979 | 1974 | 74(1)  |
| Au(19) | 3168 | 1862 | 4531 | 80(1)  |
| Au(20) | 3069 | 3050 | 6179 | 79(1)  |
| Au(21) | 4166 | 4606 | 6772 | 57(1)  |
| Au(22) | 2939 | 3196 | 2303 | 70(1)  |
| Au(23) | 2970 | 1923 | 2590 | 73(1)  |
| Au(24) | 4119 | 2377 | 1679 | 82(1)  |
| Au(25) | 2189 | 5580 | 3299 | 83(1)  |
| Au(26) | 1669 | 3717 | 1892 | 104(1) |
| S(1)   | 7921 | 5306 | 3706 | 84(3)  |
| S(2)   | 6560 | 3794 | 1539 | 115(4) |
| S(3)   | 5945 | 2111 | 2402 | 76(3)  |
| S(4)   | 3697 | 1316 | 1804 | 106(4) |
| S(5)   | 4058 | 1361 | 3905 | 110(4) |
| S(6)   | 2282 | 2312 | 5156 | 111(4) |
| S(7)   | 3809 | 3760 | 7207 | 155(6) |
| S(8)   | 2121 | 2416 | 3254 | 80(3)  |



---

|       |       |       |       |        |
|-------|-------|-------|-------|--------|
| S(9)  | 1702  | 4558  | 4107  | 66(2)  |
| S(10) | 3082  | 6433  | 6101  | 63(2)  |
| S(11) | 3087  | 6491  | 4069  | 77(3)  |
| S(12) | 5032  | 7237  | 4496  | 79(3)  |
| S(13) | 3984  | 5374  | 2330  | 108(4) |
| S(14) | 4601  | 3257  | 1358  | 115(4) |
| S(15) | 2105  | 2617  | 1267  | 141(5) |
| S(16) | 1219  | 4808  | 2557  | 138(5) |
| C(1)  | 8352  | 5971  | 3476  | 93(4)  |
| C(2)  | 9003  | 5720  | 3142  | 101(4) |
| C(3)  | 9357  | 6135  | 2782  | 107(5) |
| C(8)  | 9753  | 6831  | 3253  | 109(5) |
| C(7)  | 10046 | 7312  | 3006  | 112(5) |
| C(6)  | 9943  | 7098  | 2287  | 113(5) |
| C(5)  | 9547  | 6402  | 1816  | 111(5) |
| C(4)  | 9254  | 5921  | 2063  | 109(5) |
| C(9)  | 7305  | 3296  | 1242  | 128(5) |
| C(10) | 8035  | 3176  | 1530  | 137(6) |
| C(12) | 8787  | 2946  | 565   | 148(6) |
| C(13) | 9037  | 3137  | 69    | 150(6) |
| C(14) | 8838  | 3762  | 9     | 151(7) |
| C(15) | 8388  | 4198  | 445   | 150(6) |
| C(16) | 8137  | 4007  | 942   | 148(6) |
| C(11) | 8337  | 3381  | 1002  | 145(6) |
| C(17) | 5552  | 1198  | 1708  | 85(4)  |
| C(18) | 5458  | 556   | 1908  | 94(4)  |
| C(19) | 5123  | -160  | 1270  | 101(4) |
| C(20) | 4420  | -464  | 1176  | 105(5) |
| C(21) | 4155  | -1167 | 606   | 107(5) |
| C(22) | 4594  | -1565 | 131   | 108(5) |
| C(23) | 5297  | -1260 | 226   | 108(5) |
| C(24) | 5562  | -558  | 796   | 105(5) |
| C(25) | 3113  | 735   | 1009  | 111(5) |
| C(26) | 3432  | 599   | 347   | 120(5) |
| C(27) | 2882  | 28    | -250  | 127(5) |
| C(32) | 2723  | 366   | -681  | 130(6) |
| C(31) | 2302  | -55   | -1334 | 132(6) |
| C(30) | 2040  | -813  | -1557 | 133(6) |

---

|       |      |       |       |        |
|-------|------|-------|-------|--------|
| C(29) | 2200 | -1150 | -1126 | 132(6) |
| C(28) | 2621 | -730  | -473  | 129(6) |
| C(33) | 3506 | 446   | 3371  | 132(5) |
| C(34) | 3044 | 59    | 3724  | 145(6) |
| C(35) | 3037 | -773  | 3441  | 154(6) |
| C(40) | 2691 | -1369 | 2809  | 157(6) |
| C(39) | 2786 | -2112 | 2641  | 159(7) |
| C(38) | 3227 | -2260 | 3104  | 159(7) |
| C(37) | 3572 | -1664 | 3736  | 159(7) |
| C(36) | 3477 | -921  | 3904  | 157(6) |
| C(41) | 1690 | 1682  | 5320  | 123(5) |
| C(42) | 2210 | 1295  | 5555  | 131(5) |
| C(48) | 2776 | 1383  | 6591  | 140(6) |
| C(47) | 3045 | 1818  | 7303  | 140(6) |
| C(46) | 2678 | 2372  | 7742  | 142(6) |
| C(45) | 2042 | 2492  | 7470  | 141(6) |
| C(44) | 1773 | 2057  | 6758  | 139(6) |
| C(43) | 2140 | 1503  | 6318  | 137(6) |
| C(49) | 3904 | 4250  | 8148  | 167(7) |
| C(50) | 3849 | 3574  | 8287  | 174(7) |
| C(52) | 4665 | 4342  | 9556  | 178(8) |
| C(53) | 5253 | 4316  | 9971  | 179(8) |
| C(54) | 5622 | 3700  | 9710  | 179(8) |
| C(55) | 5403 | 3109  | 9033  | 178(8) |
| C(56) | 4814 | 3135  | 8618  | 178(8) |
| C(51) | 4446 | 3751  | 8879  | 177(7) |
| C(57) | 1717 | 1605  | 3285  | 88(4)  |
| C(58) | 1216 | 1046  | 2628  | 98(4)  |
| C(59) | 760  | 460   | 2757  | 106(5) |
| C(60) | 197  | 656   | 3134  | 109(5) |
| C(61) | -198 | 118   | 3255  | 112(5) |
| C(62) | -31  | -615  | 2998  | 113(5) |
| C(63) | 531  | -811  | 2621  | 113(5) |
| C(64) | 927  | -273  | 2501  | 110(5) |
| C(65) | 1258 | 3871  | 4318  | 70(3)  |
| C(66) | 692  | 4179  | 4764  | 75(4)  |
| C(67) | 217  | 3649  | 4934  | 79(4)  |
| C(72) | 254  | 2875  | 4598  | 83(4)  |

---

|        |      |       |      |        |
|--------|------|-------|------|--------|
| C(71)  | -227 | 2372  | 4687 | 83(5)  |
| C(70)  | -744 | 2644  | 5111 | 83(5)  |
| C(69)  | -780 | 3418  | 5447 | 82(5)  |
| C(68)  | -300 | 3921  | 5358 | 81(4)  |
| C(73)  | 2389 | 6651  | 6632 | 66(3)  |
| C(74)  | 1727 | 6778  | 6268 | 72(4)  |
| C(75)  | 1117 | 6910  | 6683 | 77(4)  |
| C(76)  | 888  | 7614  | 7009 | 79(4)  |
| C(77)  | 312  | 7696  | 7369 | 80(4)  |
| C(78)  | -36  | 7073  | 7404 | 83(4)  |
| C(79)  | 193  | 6370  | 7078 | 82(4)  |
| C(80)  | 769  | 6288  | 6717 | 79(4)  |
| C(81)  | 2701 | 7177  | 4761 | 84(4)  |
| C(82)  | 3229 | 7859  | 5285 | 87(4)  |
| C(83)  | 2846 | 8417  | 5846 | 92(4)  |
| C(88)  | 2958 | 8511  | 6533 | 93(5)  |
| C(87)  | 2638 | 9045  | 7052 | 96(5)  |
| C(86)  | 2206 | 9485  | 6884 | 96(5)  |
| C(85)  | 2095 | 9390  | 6197 | 96(5)  |
| C(84)  | 2415 | 8856  | 5678 | 94(5)  |
| C(89)  | 5392 | 7937  | 4253 | 89(4)  |
| C(90)  | 4908 | 8435  | 4116 | 98(4)  |
| C(91)  | 5145 | 8835  | 3698 | 103(5) |
| C(92)  | 5459 | 9549  | 4220 | 106(5) |
| C(93)  | 5764 | 10080 | 4034 | 109(5) |
| C(94)  | 5755 | 9897  | 3326 | 108(5) |
| C(95)  | 5440 | 9183  | 2804 | 107(5) |
| C(96)  | 5136 | 8652  | 2990 | 106(5) |
| C(97)  | 3681 | 6167  | 2182 | 128(5) |
| C(98)  | 3478 | 6835  | 2051 | 139(6) |
| C(99)  | 3231 | 7386  | 1727 | 147(6) |
| C(100) | 3270 | 8160  | 1941 | 150(6) |
| C(101) | 2745 | 8432  | 1664 | 152(7) |
| C(102) | 2181 | 7929  | 1173 | 153(7) |
| C(103) | 2143 | 7155  | 960  | 152(7) |
| C(104) | 2668 | 6883  | 1237 | 150(6) |
| C(105) | 3888 | 3451  | 883  | 122(5) |
| C(106) | 3723 | 3870  | 462  | 131(5) |

---

|        |      |      |      |        |
|--------|------|------|------|--------|
| C(107) | 3074 | 3403 | -71  | 138(6) |
| C(108) | 2562 | 3882 | 88   | 140(6) |
| C(109) | 1852 | 3581 | -147 | 141(6) |
| C(110) | 1654 | 2801 | -541 | 142(6) |
| C(111) | 2166 | 2321 | -700 | 142(6) |
| C(112) | 2876 | 2622 | -466 | 140(6) |
| C(113) | 1516 | 1811 | 1172 | 149(6) |
| C(114) | 1142 | 1696 | 465  | 158(6) |
| C(115) | 858  | 875  | 49   | 164(7) |
| C(120) | 978  | 547  | 495  | 167(7) |
| C(119) | 765  | -225 | 249  | 169(7) |
| C(118) | 434  | -670 | -442 | 169(7) |
| C(117) | 314  | -342 | -888 | 168(7) |
| C(116) | 527  | 430  | -642 | 167(7) |
| C(121) | 609  | 5454 | 2580 | 152(6) |
| C(122) | 1154 | 6095 | 2608 | 161(6) |
| C(123) | 1074 | 5816 | 1852 | 167(7) |
| C(128) | 422  | 5445 | 1445 | 170(7) |
| C(127) | 345  | 5147 | 714  | 171(7) |
| C(126) | 921  | 5220 | 391  | 172(7) |
| C(125) | 1573 | 5590 | 799  | 171(7) |
| C(124) | 1650 | 5888 | 1529 | 169(7) |

---

---

Table 3. Bond lengths [ $\text{\AA}$ ] and angles [ $^\circ$ ] for  $\text{Au}_{52}(\text{PET})_{32}$ .

---

|                |        |
|----------------|--------|
| Au(1)-Au(2)    | 3.0192 |
| Au(1)-Au(3)    | 2.7473 |
| Au(1)-Au(4)    | 2.7359 |
| Au(1)-Au(5)    | 2.9863 |
| Au(1)-Au(6)    | 2.8094 |
| Au(1)-Au(7)    | 2.7853 |
| Au(1)-Au(8)    | 2.9354 |
| Au(1)-Au(9)    | 2.9303 |
| Au(1)-Au(14)#1 | 2.8517 |
| Au(1)-Au(22)   | 2.7237 |
| Au(1)-Au(23)   | 3.3267 |
| Au(2)-Au(3)    | 2.9081 |
| Au(2)-Au(7)    | 2.9318 |
| Au(2)-Au(8)    | 2.8914 |
| Au(2)-Au(15)#1 | 2.7506 |
| Au(2)-Au(16)#1 | 2.7481 |
| Au(2)-Au(19)   | 3.0447 |
| Au(2)-Au(23)   | 3.3128 |
| Au(2)-S(8)     | 2.4001 |
| Au(3)-Au(4)    | 2.6919 |
| Au(3)-Au(14)#1 | 2.8538 |
| Au(3)-Au(15)#1 | 2.9501 |
| Au(3)-Au(19)   | 3.2107 |
| Au(3)-Au(23)   | 3.0843 |
| Au(3)-S(5)     | 2.3689 |
| Au(4)-Au(5)    | 2.9630 |
| Au(4)-Au(13)#1 | 2.9291 |
| Au(4)-Au(14)#1 | 2.8771 |
| Au(4)-Au(18)   | 3.2699 |
| Au(4)-Au(24)   | 3.0401 |
| Au(4)-S(3)     | 2.3453 |
| Au(5)-Au(6)    | 2.9051 |
| Au(5)-Au(9)    | 2.8666 |
| Au(5)-Au(13)#1 | 2.7761 |
| Au(5)-Au(18)   | 3.2506 |
| Au(5)-Au(21)#1 | 2.7298 |

---

|                 |        |
|-----------------|--------|
| Au(5)-Au(24)    | 3.1666 |
| Au(5)-S(14)     | 2.3808 |
| Au(6)-Au(7)     | 2.7208 |
| Au(6)-Au(9)     | 3.0411 |
| Au(6)-Au(10)    | 3.0987 |
| Au(6)-Au(11)    | 3.0179 |
| Au(6)-Au(22)    | 2.7295 |
| Au(6)-S(13)     | 2.3896 |
| Au(7)-Au(8)     | 3.0477 |
| Au(7)-Au(11)    | 3.0570 |
| Au(7)-Au(12)    | 3.0465 |
| Au(7)-Au(22)    | 2.7697 |
| Au(7)-Au(25)    | 3.2927 |
| Au(7)-S(9)      | 2.3439 |
| Au(8)-Au(9)#1   | 2.8942 |
| Au(8)-Au(9)     | 3.0514 |
| Au(8)-Au(11)    | 2.7384 |
| Au(8)-Au(12)    | 3.1788 |
| Au(8)-Au(13)    | 3.0046 |
| Au(8)-Au(14)#1  | 2.8886 |
| Au(8)-Au(14)    | 2.8942 |
| Au(8)-Au(15)#1  | 2.9033 |
| Au(8)-Au(16)#1  | 2.8024 |
| Au(9)-Au(8)#1   | 2.8942 |
| Au(9)-Au(10)    | 3.1801 |
| Au(9)-Au(11)    | 2.7660 |
| Au(9)-Au(13)#1  | 2.8839 |
| Au(9)-Au(14)    | 2.9049 |
| Au(9)-Au(14)#1  | 2.9008 |
| Au(9)-Au(15)    | 2.9678 |
| Au(9)-Au(21)#1  | 2.8161 |
| Au(10)-Au(11)   | 3.1773 |
| Au(10)-Au(15)   | 3.3712 |
| Au(10)-Au(21)#1 | 3.0444 |
| Au(10)-S(12)    | 2.2860 |
| Au(10)-S(13)    | 2.3040 |
| Au(11)-Au(12)   | 3.0381 |
| Au(11)-Au(14)   | 2.7777 |

---

|                 |        |
|-----------------|--------|
| Au(11)-S(11)    | 2.3670 |
| Au(12)-Au(16)#1 | 3.1573 |
| Au(12)-S(9)     | 2.3190 |
| Au(12)-S(10)    | 2.3035 |
| Au(13)-Au(4)#1  | 2.9290 |
| Au(13)-Au(5)#1  | 2.7761 |
| Au(13)-Au(9)#1  | 2.8838 |
| Au(13)-Au(14)   | 3.0276 |
| Au(13)-Au(16)#1 | 2.9590 |
| Au(13)-Au(17)#1 | 3.1408 |
| Au(13)-Au(18)#1 | 3.2895 |
| Au(13)-Au(21)   | 2.7765 |
| Au(13)-S(10)    | 2.4015 |
| Au(14)-Au(1)#1  | 2.8517 |
| Au(14)-Au(3)#1  | 2.8538 |
| Au(14)-Au(4)#1  | 2.8770 |
| Au(14)-Au(8)#1  | 2.8886 |
| Au(14)-Au(9)#1  | 2.9007 |
| Au(14)-Au(15)   | 3.0270 |
| Au(15)-Au(2)#1  | 2.7505 |
| Au(15)-Au(3)#1  | 2.9501 |
| Au(15)-Au(8)#1  | 2.9033 |
| Au(15)-Au(16)   | 2.7485 |
| Au(15)-Au(19)#1 | 3.1516 |
| Au(15)-Au(20)#1 | 3.2206 |
| Au(15)-Au(21)#1 | 2.9708 |
| Au(15)-S(12)    | 2.4001 |
| Au(16)-Au(2)#1  | 2.7480 |
| Au(16)-Au(8)#1  | 2.8023 |
| Au(16)-Au(12)#1 | 3.1572 |
| Au(16)-Au(13)#1 | 2.9590 |
| Au(16)-Au(17)   | 3.3534 |
| Au(16)-Au(20)#1 | 3.1150 |
| Au(16)-Au(21)#1 | 2.9628 |
| Au(16)-S(1)     | 2.3415 |
| Au(17)-Au(13)#1 | 3.1408 |
| Au(17)-Au(18)   | 3.1759 |
| Au(17)-Au(21)#1 | 3.1242 |

---

|                 |        |
|-----------------|--------|
| Au(17)-S(1)     | 2.2998 |
| Au(17)-S(2)     | 2.3375 |
| Au(18)-Au(13)#1 | 3.2895 |
| Au(18)-S(2)     | 2.3079 |
| Au(18)-S(3)     | 2.3178 |
| Au(19)-Au(15)#1 | 3.1515 |
| Au(19)-Au(20)   | 3.2901 |
| Au(19)-S(5)     | 2.2924 |
| Au(19)-S(6)     | 2.2635 |
| Au(20)-Au(15)#1 | 3.2207 |
| Au(20)-Au(16)#1 | 3.1150 |
| Au(20)-Au(21)   | 3.2355 |
| Au(20)-S(6)     | 2.3135 |
| Au(20)-S(7)     | 2.2659 |
| Au(21)-Au(5)#1  | 2.7298 |
| Au(21)-Au(9)#1  | 2.8162 |
| Au(21)-Au(10)#1 | 3.0444 |
| Au(21)-Au(15)#1 | 2.9709 |
| Au(21)-Au(16)#1 | 2.9628 |
| Au(21)-Au(17)#1 | 3.1241 |
| Au(21)-S(7)     | 2.3446 |
| Au(22)-Au(23)   | 2.8648 |
| Au(22)-Au(24)   | 2.9771 |
| Au(22)-Au(26)   | 2.9427 |
| Au(22)-S(15)    | 2.3520 |
| Au(23)-S(4)     | 2.2731 |
| Au(23)-S(8)     | 2.2634 |
| Au(24)-S(4)     | 2.3325 |
| Au(24)-S(14)    | 2.3038 |
| Au(25)-S(11)    | 2.2844 |
| Au(25)-S(16)    | 2.2609 |
| Au(26)-S(15)    | 2.2802 |
| Au(26)-S(16)    | 2.2984 |
| S(1)-C(1)       | 1.7756 |
| S(2)-C(9)       | 1.8148 |
| S(3)-C(17)      | 1.7916 |
| S(4)-C(25)      | 1.7734 |
| S(5)-C(33)      | 1.8225 |



---

|              |        |
|--------------|--------|
| S(6)-C(41)   | 1.7917 |
| S(7)-C(49)   | 1.7857 |
| S(8)-C(57)   | 1.7611 |
| S(9)-C(65)   | 1.7952 |
| S(10)-C(73)  | 1.7893 |
| S(11)-C(81)  | 1.7843 |
| S(12)-C(89)  | 1.8008 |
| S(13)-C(97)  | 1.8706 |
| S(14)-C(105) | 1.8003 |
| S(15)-C(113) | 1.8000 |
| S(16)-C(121) | 1.8025 |
| C(1)-H(1A)   | 0.9900 |
| C(1)-H(1B)   | 0.9900 |
| C(1)-C(2)    | 1.5118 |
| C(2)-H(2A)   | 0.9900 |
| C(2)-H(2B)   | 0.9900 |
| C(2)-C(3)    | 1.5214 |
| C(3)-C(8)    | 1.3900 |
| C(3)-C(4)    | 1.3900 |
| C(8)-H(8)    | 0.9500 |
| C(8)-C(7)    | 1.3900 |
| C(7)-H(7)    | 0.9500 |
| C(7)-C(6)    | 1.3900 |
| C(6)-H(6)    | 0.9500 |
| C(6)-C(5)    | 1.3900 |
| C(5)-H(5)    | 0.9500 |
| C(5)-C(4)    | 1.3900 |
| C(4)-H(4)    | 0.9500 |
| C(9)-H(9A)   | 0.9900 |
| C(9)-H(9B)   | 0.9900 |
| C(9)-C(10)   | 1.5589 |
| C(10)-C(11)  | 1.5103 |
| C(12)-C(13)  | 1.3900 |
| C(12)-C(11)  | 1.3900 |
| C(13)-C(14)  | 1.3900 |
| C(14)-C(15)  | 1.3900 |
| C(15)-C(16)  | 1.3900 |
| C(16)-C(11)  | 1.3900 |

---

|              |        |
|--------------|--------|
| C(17)-H(17A) | 0.9900 |
| C(17)-H(17B) | 0.9900 |
| C(17)-C(18)  | 1.5205 |
| C(18)-H(18A) | 0.9900 |
| C(18)-H(18B) | 0.9900 |
| C(18)-C(19)  | 1.4961 |
| C(19)-C(20)  | 1.3900 |
| C(19)-C(24)  | 1.3900 |
| C(20)-H(20)  | 0.9500 |
| C(20)-C(21)  | 1.3900 |
| C(21)-H(21)  | 0.9500 |
| C(21)-C(22)  | 1.3900 |
| C(22)-H(22)  | 0.9500 |
| C(22)-C(23)  | 1.3900 |
| C(23)-H(23)  | 0.9500 |
| C(23)-C(24)  | 1.3900 |
| C(24)-H(24)  | 0.9500 |
| C(25)-C(26)  | 1.5207 |
| C(26)-C(27)  | 1.5084 |
| C(27)-C(32)  | 1.3900 |
| C(27)-C(28)  | 1.3900 |
| C(32)-H(32)  | 0.9500 |
| C(32)-C(31)  | 1.3900 |
| C(31)-H(31)  | 0.9500 |
| C(31)-C(30)  | 1.3900 |
| C(30)-H(30)  | 0.9500 |
| C(30)-C(29)  | 1.3900 |
| C(29)-H(29)  | 0.9500 |
| C(29)-C(28)  | 1.3900 |
| C(28)-H(28)  | 0.9500 |
| C(33)-H(33A) | 0.9900 |
| C(33)-H(33B) | 0.9900 |
| C(33)-C(34)  | 1.5749 |
| C(34)-C(35)  | 1.4845 |
| C(35)-C(40)  | 1.3900 |
| C(35)-C(36)  | 1.3900 |
| C(40)-C(39)  | 1.3900 |
| C(39)-C(38)  | 1.3900 |

---

|              |        |
|--------------|--------|
| C(38)-C(37)  | 1.3900 |
| C(37)-C(36)  | 1.3900 |
| C(41)-H(41A) | 0.9900 |
| C(41)-H(41B) | 0.9900 |
| C(41)-C(42)  | 1.4930 |
| C(42)-C(43)  | 1.5198 |
| C(48)-C(47)  | 1.3900 |
| C(48)-C(43)  | 1.3900 |
| C(47)-C(46)  | 1.3900 |
| C(46)-C(45)  | 1.3900 |
| C(45)-C(44)  | 1.3900 |
| C(44)-C(43)  | 1.3900 |
| C(49)-H(49A) | 0.9900 |
| C(49)-H(49B) | 0.9900 |
| C(49)-C(50)  | 1.4999 |
| C(50)-H(50A) | 0.9900 |
| C(50)-H(50B) | 0.9900 |
| C(50)-C(51)  | 1.5170 |
| C(52)-H(52)  | 0.9500 |
| C(52)-C(53)  | 1.3900 |
| C(52)-C(51)  | 1.3900 |
| C(53)-H(53)  | 0.9500 |
| C(53)-C(54)  | 1.3900 |
| C(54)-H(54)  | 0.9500 |
| C(54)-C(55)  | 1.3900 |
| C(55)-H(55)  | 0.9500 |
| C(55)-C(56)  | 1.3900 |
| C(56)-H(56)  | 0.9500 |
| C(56)-C(51)  | 1.3900 |
| C(57)-H(57A) | 0.9900 |
| C(57)-H(57B) | 0.9900 |
| C(57)-C(58)  | 1.5164 |
| C(58)-H(58A) | 0.9900 |
| C(58)-H(58B) | 0.9900 |
| C(58)-C(59)  | 1.5364 |
| C(59)-C(60)  | 1.3900 |
| C(59)-C(64)  | 1.3900 |
| C(60)-H(60)  | 0.9500 |

---

|              |        |
|--------------|--------|
| C(60)-C(61)  | 1.3900 |
| C(61)-H(61)  | 0.9500 |
| C(61)-C(62)  | 1.3900 |
| C(62)-H(62)  | 0.9500 |
| C(62)-C(63)  | 1.3900 |
| C(63)-H(63)  | 0.9500 |
| C(63)-C(64)  | 1.3900 |
| C(64)-H(64)  | 0.9500 |
| C(65)-H(65A) | 0.9900 |
| C(65)-H(65B) | 0.9900 |
| C(65)-C(66)  | 1.5044 |
| C(66)-C(67)  | 1.5207 |
| C(67)-C(72)  | 1.3900 |
| C(67)-C(68)  | 1.3900 |
| C(72)-H(72)  | 0.9500 |
| C(72)-C(71)  | 1.3900 |
| C(71)-H(71)  | 0.9500 |
| C(71)-C(70)  | 1.3900 |
| C(70)-H(70)  | 0.9500 |
| C(70)-C(69)  | 1.3900 |
| C(69)-H(69)  | 0.9500 |
| C(69)-C(68)  | 1.3900 |
| C(68)-H(68)  | 0.9500 |
| C(73)-H(73A) | 0.9900 |
| C(73)-H(73B) | 0.9900 |
| C(73)-C(74)  | 1.5288 |
| C(74)-C(75)  | 1.5097 |
| C(75)-C(76)  | 1.3900 |
| C(75)-C(80)  | 1.3900 |
| C(76)-H(76)  | 0.9500 |
| C(76)-C(77)  | 1.3900 |
| C(77)-H(77)  | 0.9500 |
| C(77)-C(78)  | 1.3900 |
| C(78)-H(78)  | 0.9500 |
| C(78)-C(79)  | 1.3900 |
| C(79)-H(79)  | 0.9500 |
| C(79)-C(80)  | 1.3900 |
| C(80)-H(80)  | 0.9500 |

---

|              |        |
|--------------|--------|
| C(81)-H(81A) | 0.9900 |
| C(81)-H(81B) | 0.9900 |
| C(81)-C(82)  | 1.5195 |
| C(82)-H(82A) | 0.9900 |
| C(82)-H(82B) | 0.9900 |
| C(82)-C(83)  | 1.5267 |
| C(83)-C(88)  | 1.3900 |
| C(83)-C(84)  | 1.3900 |
| C(88)-H(88)  | 0.9500 |
| C(88)-C(87)  | 1.3900 |
| C(87)-H(87)  | 0.9500 |
| C(87)-C(86)  | 1.3900 |
| C(86)-H(86)  | 0.9500 |
| C(86)-C(85)  | 1.3900 |
| C(85)-H(85)  | 0.9500 |
| C(85)-C(84)  | 1.3900 |
| C(84)-H(84)  | 0.9500 |
| C(89)-H(89A) | 0.9900 |
| C(89)-H(89B) | 0.9900 |
| C(89)-C(90)  | 1.5165 |
| C(90)-H(90A) | 0.9900 |
| C(90)-H(90B) | 0.9900 |
| C(90)-C(91)  | 1.5156 |
| C(91)-C(92)  | 1.3900 |
| C(91)-C(96)  | 1.3900 |
| C(92)-H(92)  | 0.9500 |
| C(92)-C(93)  | 1.3900 |
| C(93)-H(93)  | 0.9500 |
| C(93)-C(94)  | 1.3900 |
| C(94)-H(94)  | 0.9500 |
| C(94)-C(95)  | 1.3900 |
| C(95)-H(95)  | 0.9500 |
| C(95)-C(96)  | 1.3900 |
| C(96)-H(96)  | 0.9500 |
| C(97)-C(98)  | 1.5485 |
| C(98)-C(99)  | 1.6175 |
| C(99)-C(100) | 1.3900 |
| C(99)-C(104) | 1.3900 |

---

|               |        |
|---------------|--------|
| C(100)-C(101) | 1.3900 |
| C(101)-C(102) | 1.3900 |
| C(102)-C(103) | 1.3900 |
| C(103)-C(104) | 1.3900 |
| C(105)-H(10A) | 0.9900 |
| C(105)-H(10B) | 0.9900 |
| C(105)-C(106) | 1.5081 |
| C(106)-C(107) | 1.5169 |
| C(107)-C(108) | 1.3900 |
| C(107)-C(112) | 1.3900 |
| C(108)-H(108) | 0.9500 |
| C(108)-C(109) | 1.3900 |
| C(109)-H(109) | 0.9500 |
| C(109)-C(110) | 1.3900 |
| C(110)-H(110) | 0.9500 |
| C(110)-C(111) | 1.3900 |
| C(111)-H(111) | 0.9500 |
| C(111)-C(112) | 1.3900 |
| C(112)-H(112) | 0.9500 |
| C(113)-H(11A) | 0.9900 |
| C(113)-H(11B) | 0.9900 |
| C(113)-C(114) | 1.5217 |
| C(114)-H(11C) | 0.9900 |
| C(114)-H(11D) | 0.9900 |
| C(114)-C(115) | 1.4859 |
| C(115)-C(120) | 1.3900 |
| C(115)-C(116) | 1.3900 |
| C(120)-C(119) | 1.3900 |
| C(119)-C(118) | 1.3900 |
| C(118)-C(117) | 1.3900 |
| C(117)-C(116) | 1.3900 |
| C(121)-H(12A) | 0.9900 |
| C(121)-H(12B) | 0.9900 |
| C(121)-C(122) | 1.5549 |
| C(122)-H(12C) | 0.9900 |
| C(122)-H(12D) | 0.9900 |
| C(122)-C(123) | 1.4456 |
| C(123)-C(128) | 1.3900 |

---

|                      |        |
|----------------------|--------|
| C(123)-C(124)        | 1.3900 |
| C(128)-C(127)        | 1.3900 |
| C(127)-C(126)        | 1.3900 |
| C(126)-C(125)        | 1.3900 |
| C(125)-C(124)        | 1.3900 |
| <br>                 |        |
| Au(2)-Au(1)-Au(23)   | 62.7   |
| Au(3)-Au(1)-Au(2)    | 60.4   |
| Au(3)-Au(1)-Au(5)    | 121.0  |
| Au(3)-Au(1)-Au(6)    | 174.6  |
| Au(3)-Au(1)-Au(7)    | 120.4  |
| Au(3)-Au(1)-Au(8)    | 90.4   |
| Au(3)-Au(1)-Au(9)    | 121.4  |
| Au(3)-Au(1)-Au(14)#1 | 61.3   |
| Au(3)-Au(1)-Au(23)   | 60.1   |
| Au(4)-Au(1)-Au(2)    | 119.2  |
| Au(4)-Au(1)-Au(3)    | 58.8   |
| Au(4)-Au(1)-Au(5)    | 62.2   |
| Au(4)-Au(1)-Au(6)    | 121.9  |
| Au(4)-Au(1)-Au(7)    | 173.3  |
| Au(4)-Au(1)-Au(8)    | 121.7  |
| Au(4)-Au(1)-Au(9)    | 91.0   |
| Au(4)-Au(1)-Au(14)#1 | 61.9   |
| Au(4)-Au(1)-Au(23)   | 87.3   |
| Au(5)-Au(1)-Au(2)    | 178.4  |
| Au(5)-Au(1)-Au(23)   | 118.6  |
| Au(6)-Au(1)-Au(2)    | 118.7  |
| Au(6)-Au(1)-Au(5)    | 60.1   |
| Au(6)-Au(1)-Au(8)    | 93.3   |
| Au(6)-Au(1)-Au(9)    | 63.9   |
| Au(6)-Au(1)-Au(14)#1 | 124.1  |
| Au(6)-Au(1)-Au(23)   | 114.5  |
| Au(7)-Au(1)-Au(2)    | 60.5   |
| Au(7)-Au(1)-Au(5)    | 118.3  |
| Au(7)-Au(1)-Au(6)    | 58.2   |
| Au(7)-Au(1)-Au(8)    | 64.3   |
| Au(7)-Au(1)-Au(9)    | 94.7   |
| Au(7)-Au(1)-Au(14)#1 | 124.2  |

---

|                       |       |
|-----------------------|-------|
| Au(7)-Au(1)-Au(23)    | 86.8  |
| Au(8)-Au(1)-Au(2)     | 58.1  |
| Au(8)-Au(1)-Au(5)     | 120.6 |
| Au(8)-Au(1)-Au(23)    | 120.8 |
| Au(9)-Au(1)-Au(2)     | 120.8 |
| Au(9)-Au(1)-Au(5)     | 58.0  |
| Au(9)-Au(1)-Au(8)     | 62.7  |
| Au(9)-Au(1)-Au(23)    | 176.5 |
| Au(14)#1-Au(1)-Au(2)  | 89.1  |
| Au(14)#1-Au(1)-Au(5)  | 90.9  |
| Au(14)#1-Au(1)-Au(8)  | 59.9  |
| Au(14)#1-Au(1)-Au(9)  | 60.2  |
| Au(14)#1-Au(1)-Au(23) | 121.4 |
| Au(22)-Au(1)-Au(2)    | 92.2  |
| Au(22)-Au(1)-Au(3)    | 115.5 |
| Au(22)-Au(1)-Au(4)    | 113.4 |
| Au(22)-Au(1)-Au(5)    | 88.0  |
| Au(22)-Au(1)-Au(6)    | 59.1  |
| Au(22)-Au(1)-Au(7)    | 60.4  |
| Au(22)-Au(1)-Au(8)    | 124.6 |
| Au(22)-Au(1)-Au(9)    | 122.7 |
| Au(22)-Au(1)-Au(14)#1 | 175.1 |
| Au(22)-Au(1)-Au(23)   | 55.4  |
| Au(1)-Au(2)-Au(19)    | 120.1 |
| Au(1)-Au(2)-Au(23)    | 63.2  |
| Au(3)-Au(2)-Au(1)     | 55.2  |
| Au(3)-Au(2)-Au(7)     | 110.6 |
| Au(3)-Au(2)-Au(19)    | 65.2  |
| Au(3)-Au(2)-Au(23)    | 59.0  |
| Au(7)-Au(2)-Au(1)     | 55.8  |
| Au(7)-Au(2)-Au(19)    | 166.8 |
| Au(7)-Au(2)-Au(23)    | 84.8  |
| Au(8)-Au(2)-Au(1)     | 59.5  |
| Au(8)-Au(2)-Au(3)     | 88.2  |
| Au(8)-Au(2)-Au(7)     | 63.1  |
| Au(8)-Au(2)-Au(19)    | 127.5 |
| Au(8)-Au(2)-Au(23)    | 122.7 |
| Au(15)#1-Au(2)-Au(1)  | 91.0  |



---

|                         |       |
|-------------------------|-------|
| Au(15)#1-Au(2)-Au(3)    | 62.8  |
| Au(15)#1-Au(2)-Au(7)    | 124.7 |
| Au(15)#1-Au(2)-Au(8)    | 61.9  |
| Au(15)#1-Au(2)-Au(19)   | 65.7  |
| Au(15)#1-Au(2)-Au(23)   | 121.1 |
| Au(16)#1-Au(2)-Au(1)    | 119.0 |
| Au(16)#1-Au(2)-Au(3)    | 122.3 |
| Au(16)#1-Au(2)-Au(7)    | 96.2  |
| Au(16)#1-Au(2)-Au(8)    | 59.5  |
| Au(16)#1-Au(2)-Au(15)#1 | 60.0  |
| Au(16)#1-Au(2)-Au(19)   | 96.4  |
| Au(16)#1-Au(2)-Au(23)   | 177.7 |
| Au(19)-Au(2)-Au(23)     | 82.5  |
| S(8)-Au(2)-Au(1)        | 95.4  |
| S(8)-Au(2)-Au(3)        | 100.5 |
| S(8)-Au(2)-Au(7)        | 79.3  |
| S(8)-Au(2)-Au(8)        | 141.9 |
| S(8)-Au(2)-Au(15)#1     | 153.6 |
| S(8)-Au(2)-Au(16)#1     | 135.0 |
| S(8)-Au(2)-Au(19)       | 89.1  |
| S(8)-Au(2)-Au(23)       | 43.1  |
| Au(1)-Au(3)-Au(2)       | 64.5  |
| Au(1)-Au(3)-Au(14)#1    | 61.2  |
| Au(1)-Au(3)-Au(15)#1    | 92.6  |
| Au(1)-Au(3)-Au(19)      | 123.5 |
| Au(1)-Au(3)-Au(23)      | 69.3  |
| Au(2)-Au(3)-Au(15)#1    | 56.0  |
| Au(2)-Au(3)-Au(19)      | 59.4  |
| Au(2)-Au(3)-Au(23)      | 67.0  |
| Au(4)-Au(3)-Au(1)       | 60.4  |
| Au(4)-Au(3)-Au(2)       | 124.8 |
| Au(4)-Au(3)-Au(14)#1    | 62.4  |
| Au(4)-Au(3)-Au(15)#1    | 125.3 |
| Au(4)-Au(3)-Au(19)      | 173.1 |
| Au(4)-Au(3)-Au(23)      | 93.2  |
| Au(14)#1-Au(3)-Au(2)    | 91.3  |
| Au(14)#1-Au(3)-Au(15)#1 | 62.8  |
| Au(14)#1-Au(3)-Au(19)   | 124.1 |

---

|                         |       |
|-------------------------|-------|
| Au(14)#1-Au(3)-Au(23)   | 130.5 |
| Au(15)#1-Au(3)-Au(19)   | 61.4  |
| Au(15)#1-Au(3)-Au(23)   | 122.3 |
| Au(23)-Au(3)-Au(19)     | 83.6  |
| S(5)-Au(3)-Au(1)        | 160.6 |
| S(5)-Au(3)-Au(2)        | 103.9 |
| S(5)-Au(3)-Au(4)        | 128.8 |
| S(5)-Au(3)-Au(14)#1     | 137.1 |
| S(5)-Au(3)-Au(15)#1     | 92.9  |
| S(5)-Au(3)-Au(19)       | 45.5  |
| S(5)-Au(3)-Au(23)       | 92.2  |
| Au(1)-Au(4)-Au(5)       | 63.1  |
| Au(1)-Au(4)-Au(13)#1    | 91.8  |
| Au(1)-Au(4)-Au(14)#1    | 61.0  |
| Au(1)-Au(4)-Au(18)      | 125.2 |
| Au(1)-Au(4)-Au(24)      | 73.1  |
| Au(3)-Au(4)-Au(1)       | 60.8  |
| Au(3)-Au(4)-Au(5)       | 123.9 |
| Au(3)-Au(4)-Au(13)#1    | 124.4 |
| Au(3)-Au(4)-Au(14)#1    | 61.5  |
| Au(3)-Au(4)-Au(18)      | 171.1 |
| Au(3)-Au(4)-Au(24)      | 100.1 |
| Au(5)-Au(4)-Au(18)      | 62.6  |
| Au(5)-Au(4)-Au(24)      | 63.7  |
| Au(13)#1-Au(4)-Au(5)    | 56.2  |
| Au(13)#1-Au(4)-Au(18)   | 63.8  |
| Au(13)#1-Au(4)-Au(24)   | 118.0 |
| Au(14)#1-Au(4)-Au(5)    | 90.9  |
| Au(14)#1-Au(4)-Au(13)#1 | 62.9  |
| Au(14)#1-Au(4)-Au(18)   | 126.5 |
| Au(14)#1-Au(4)-Au(24)   | 134.0 |
| Au(24)-Au(4)-Au(18)     | 77.0  |
| S(3)-Au(4)-Au(1)        | 163.9 |
| S(3)-Au(4)-Au(3)        | 127.2 |
| S(3)-Au(4)-Au(5)        | 107.4 |
| S(3)-Au(4)-Au(13)#1     | 92.8  |
| S(3)-Au(4)-Au(14)#1     | 134.3 |
| S(3)-Au(4)-Au(18)       | 45.1  |

---

|                         |       |
|-------------------------|-------|
| S(3)-Au(4)-Au(24)       | 91.1  |
| Au(1)-Au(5)-Au(18)      | 117.6 |
| Au(1)-Au(5)-Au(24)      | 68.1  |
| Au(4)-Au(5)-Au(1)       | 54.8  |
| Au(4)-Au(5)-Au(18)      | 63.3  |
| Au(4)-Au(5)-Au(24)      | 59.4  |
| Au(6)-Au(5)-Au(1)       | 56.9  |
| Au(6)-Au(5)-Au(4)       | 111.4 |
| Au(6)-Au(5)-Au(18)      | 165.9 |
| Au(6)-Au(5)-Au(24)      | 90.6  |
| Au(9)-Au(5)-Au(1)       | 60.0  |
| Au(9)-Au(5)-Au(4)       | 87.8  |
| Au(9)-Au(5)-Au(6)       | 63.6  |
| Au(9)-Au(5)-Au(18)      | 126.9 |
| Au(9)-Au(5)-Au(24)      | 128.1 |
| Au(13)#1-Au(5)-Au(1)    | 89.8  |
| Au(13)#1-Au(5)-Au(4)    | 61.3  |
| Au(13)#1-Au(5)-Au(6)    | 124.7 |
| Au(13)#1-Au(5)-Au(9)    | 61.4  |
| Au(13)#1-Au(5)-Au(18)   | 65.6  |
| Au(13)#1-Au(5)-Au(24)   | 118.7 |
| Au(21)#1-Au(5)-Au(1)    | 120.4 |
| Au(21)#1-Au(5)-Au(4)    | 121.6 |
| Au(21)#1-Au(5)-Au(6)    | 97.0  |
| Au(21)#1-Au(5)-Au(9)    | 60.4  |
| Au(21)#1-Au(5)-Au(13)#1 | 60.6  |
| Au(21)#1-Au(5)-Au(18)   | 96.7  |
| Au(21)#1-Au(5)-Au(24)   | 170.9 |
| Au(24)-Au(5)-Au(18)     | 75.5  |
| S(14)-Au(5)-Au(1)       | 110.2 |
| S(14)-Au(5)-Au(4)       | 99.4  |
| S(14)-Au(5)-Au(6)       | 97.4  |
| S(14)-Au(5)-Au(9)       | 161.0 |
| S(14)-Au(5)-Au(13)#1    | 137.3 |
| S(14)-Au(5)-Au(18)      | 71.7  |
| S(14)-Au(5)-Au(21)#1    | 127.0 |
| S(14)-Au(5)-Au(24)      | 46.5  |
| Au(1)-Au(6)-Au(5)       | 63.0  |

---

|                     |       |
|---------------------|-------|
| Au(1)-Au(6)-Au(9)   | 60.0  |
| Au(1)-Au(6)-Au(10)  | 122.3 |
| Au(1)-Au(6)-Au(11)  | 85.1  |
| Au(5)-Au(6)-Au(9)   | 57.6  |
| Au(5)-Au(6)-Au(10)  | 85.4  |
| Au(5)-Au(6)-Au(11)  | 111.9 |
| Au(7)-Au(6)-Au(1)   | 60.5  |
| Au(7)-Au(6)-Au(5)   | 123.4 |
| Au(7)-Au(6)-Au(9)   | 93.5  |
| Au(7)-Au(6)-Au(10)  | 125.9 |
| Au(7)-Au(6)-Au(11)  | 64.1  |
| Au(7)-Au(6)-Au(22)  | 61.1  |
| Au(9)-Au(6)-Au(10)  | 62.4  |
| Au(11)-Au(6)-Au(9)  | 54.3  |
| Au(11)-Au(6)-Au(10) | 62.6  |
| Au(22)-Au(6)-Au(1)  | 58.9  |
| Au(22)-Au(6)-Au(5)  | 89.5  |
| Au(22)-Au(6)-Au(9)  | 118.6 |
| Au(22)-Au(6)-Au(10) | 173.0 |
| Au(22)-Au(6)-Au(11) | 124.0 |
| S(13)-Au(6)-Au(1)   | 147.9 |
| S(13)-Au(6)-Au(5)   | 85.0  |
| S(13)-Au(6)-Au(7)   | 151.5 |
| S(13)-Au(6)-Au(9)   | 102.1 |
| S(13)-Au(6)-Au(10)  | 47.5  |
| S(13)-Au(6)-Au(11)  | 106.4 |
| S(13)-Au(6)-Au(22)  | 127.3 |
| Au(1)-Au(7)-Au(2)   | 63.7  |
| Au(1)-Au(7)-Au(8)   | 60.2  |
| Au(1)-Au(7)-Au(11)  | 84.7  |
| Au(1)-Au(7)-Au(12)  | 123.1 |
| Au(1)-Au(7)-Au(25)  | 130.6 |
| Au(2)-Au(7)-Au(8)   | 57.8  |
| Au(2)-Au(7)-Au(11)  | 111.0 |
| Au(2)-Au(7)-Au(12)  | 87.9  |
| Au(2)-Au(7)-Au(25)  | 164.2 |
| Au(6)-Au(7)-Au(1)   | 61.3  |
| Au(6)-Au(7)-Au(2)   | 125.0 |

---

|                      |       |
|----------------------|-------|
| Au(6)-Au(7)-Au(8)    | 92.7  |
| Au(6)-Au(7)-Au(11)   | 62.7  |
| Au(6)-Au(7)-Au(12)   | 120.9 |
| Au(6)-Au(7)-Au(22)   | 59.6  |
| Au(6)-Au(7)-Au(25)   | 69.5  |
| Au(8)-Au(7)-Au(11)   | 53.3  |
| Au(8)-Au(7)-Au(25)   | 120.1 |
| Au(11)-Au(7)-Au(25)  | 68.3  |
| Au(12)-Au(7)-Au(8)   | 62.9  |
| Au(12)-Au(7)-Au(11)  | 59.7  |
| Au(12)-Au(7)-Au(25)  | 78.2  |
| Au(22)-Au(7)-Au(1)   | 58.7  |
| Au(22)-Au(7)-Au(2)   | 93.1  |
| Au(22)-Au(7)-Au(8)   | 118.9 |
| Au(22)-Au(7)-Au(11)  | 121.2 |
| Au(22)-Au(7)-Au(12)  | 178.2 |
| Au(22)-Au(7)-Au(25)  | 100.5 |
| S(9)-Au(7)-Au(1)     | 158.5 |
| S(9)-Au(7)-Au(2)     | 94.9  |
| S(9)-Au(7)-Au(6)     | 139.8 |
| S(9)-Au(7)-Au(8)     | 107.3 |
| S(9)-Au(7)-Au(11)    | 101.8 |
| S(9)-Au(7)-Au(12)    | 48.9  |
| S(9)-Au(7)-Au(22)    | 129.5 |
| S(9)-Au(7)-Au(25)    | 70.3  |
| Au(1)-Au(8)-Au(7)    | 55.4  |
| Au(1)-Au(8)-Au(9)    | 58.6  |
| Au(1)-Au(8)-Au(12)   | 114.0 |
| Au(1)-Au(8)-Au(13)   | 177.4 |
| Au(2)-Au(8)-Au(1)    | 62.4  |
| Au(2)-Au(8)-Au(7)    | 59.1  |
| Au(2)-Au(8)-Au(9)    | 121.0 |
| Au(2)-Au(8)-Au(9)#1  | 118.3 |
| Au(2)-Au(8)-Au(12)   | 86.1  |
| Au(2)-Au(8)-Au(13)   | 118.8 |
| Au(2)-Au(8)-Au(14)   | 178.0 |
| Au(2)-Au(8)-Au(15)#1 | 56.7  |
| Au(7)-Au(8)-Au(9)    | 87.1  |

---

|                         |       |
|-------------------------|-------|
| Au(7)-Au(8)-Au(12)      | 58.5  |
| Au(9)#1-Au(8)-Au(1)     | 118.9 |
| Au(9)#1-Au(8)-Au(7)     | 174.3 |
| Au(9)#1-Au(8)-Au(9)     | 90.4  |
| Au(9)-Au(8)-Au(12)      | 117.6 |
| Au(9)#1-Au(8)-Au(12)    | 127.1 |
| Au(9)#1-Au(8)-Au(13)    | 58.5  |
| Au(9)#1-Au(8)-Au(15)#1  | 61.6  |
| Au(11)-Au(8)-Au(1)      | 88.0  |
| Au(11)-Au(8)-Au(2)      | 122.5 |
| Au(11)-Au(8)-Au(7)      | 63.5  |
| Au(11)-Au(8)-Au(9)#1    | 119.2 |
| Au(11)-Au(8)-Au(9)      | 56.8  |
| Au(11)-Au(8)-Au(12)     | 61.3  |
| Au(11)-Au(8)-Au(13)     | 93.1  |
| Au(11)-Au(8)-Au(14)#1   | 115.1 |
| Au(11)-Au(8)-Au(14)     | 59.0  |
| Au(11)-Au(8)-Au(15)#1   | 177.6 |
| Au(11)-Au(8)-Au(16)#1   | 124.3 |
| Au(13)-Au(8)-Au(7)      | 127.1 |
| Au(13)-Au(8)-Au(9)      | 120.1 |
| Au(13)-Au(8)-Au(12)     | 68.6  |
| Au(14)#1-Au(8)-Au(1)    | 58.6  |
| Au(14)-Au(8)-Au(1)      | 117.0 |
| Au(14)#1-Au(8)-Au(2)    | 91.0  |
| Au(14)#1-Au(8)-Au(7)    | 114.1 |
| Au(14)-Au(8)-Au(7)      | 122.4 |
| Au(14)#1-Au(8)-Au(9)    | 58.4  |
| Au(14)#1-Au(8)-Au(9)#1  | 60.3  |
| Au(14)-Au(8)-Au(9)      | 58.4  |
| Au(14)-Au(8)-Au(9)#1    | 60.1  |
| Au(14)-Au(8)-Au(12)     | 95.8  |
| Au(14)#1-Au(8)-Au(12)   | 172.5 |
| Au(14)#1-Au(8)-Au(13)   | 118.8 |
| Au(14)-Au(8)-Au(13)     | 61.7  |
| Au(14)#1-Au(8)-Au(14)   | 87.1  |
| Au(14)-Au(8)-Au(15)#1   | 121.7 |
| Au(14)#1-Au(8)-Au(15)#1 | 63.0  |

---

|                         |       |
|-------------------------|-------|
| Au(15)#1-Au(8)-Au(1)    | 89.8  |
| Au(15)#1-Au(8)-Au(7)    | 115.5 |
| Au(15)#1-Au(8)-Au(9)    | 121.4 |
| Au(15)#1-Au(8)-Au(12)   | 120.4 |
| Au(15)#1-Au(8)-Au(13)   | 89.2  |
| Au(16)#1-Au(8)-Au(1)    | 120.1 |
| Au(16)#1-Au(8)-Au(2)    | 57.7  |
| Au(16)#1-Au(8)-Au(7)    | 92.5  |
| Au(16)#1-Au(8)-Au(9)#1  | 89.8  |
| Au(16)#1-Au(8)-Au(9)    | 178.5 |
| Au(16)#1-Au(8)-Au(12)   | 63.4  |
| Au(16)#1-Au(8)-Au(13)   | 61.2  |
| Au(16)#1-Au(8)-Au(14)   | 122.9 |
| Au(16)#1-Au(8)-Au(14)#1 | 120.6 |
| Au(16)#1-Au(8)-Au(15)#1 | 57.6  |
| Au(1)-Au(9)-Au(6)       | 56.1  |
| Au(1)-Au(9)-Au(8)       | 58.7  |
| Au(1)-Au(9)-Au(10)      | 115.8 |
| Au(1)-Au(9)-Au(15)      | 177.8 |
| Au(5)-Au(9)-Au(1)       | 62.0  |
| Au(5)-Au(9)-Au(6)       | 58.8  |
| Au(5)-Au(9)-Au(8)#1     | 120.4 |
| Au(5)-Au(9)-Au(8)       | 120.7 |
| Au(5)-Au(9)-Au(10)      | 84.6  |
| Au(5)-Au(9)-Au(13)#1    | 57.7  |
| Au(5)-Au(9)-Au(14)#1    | 92.4  |
| Au(5)-Au(9)-Au(14)      | 178.8 |
| Au(5)-Au(9)-Au(15)      | 119.2 |
| Au(6)-Au(9)-Au(8)       | 86.6  |
| Au(6)-Au(9)-Au(10)      | 59.7  |
| Au(8)#1-Au(9)-Au(1)     | 118.5 |
| Au(8)#1-Au(9)-Au(6)     | 174.5 |
| Au(8)#1-Au(9)-Au(8)     | 89.6  |
| Au(8)-Au(9)-Au(10)      | 119.7 |
| Au(8)#1-Au(9)-Au(10)    | 125.8 |
| Au(8)#1-Au(9)-Au(14)#1  | 59.9  |
| Au(8)#1-Au(9)-Au(14)    | 59.8  |
| Au(8)#1-Au(9)-Au(15)    | 59.4  |

---

|                         |       |
|-------------------------|-------|
| Au(11)-Au(9)-Au(1)      | 87.5  |
| Au(11)-Au(9)-Au(5)      | 121.2 |
| Au(11)-Au(9)-Au(6)      | 62.4  |
| Au(11)-Au(9)-Au(8)      | 55.9  |
| Au(11)-Au(9)-Au(8)#1    | 118.3 |
| Au(11)-Au(9)-Au(10)     | 64.2  |
| Au(11)-Au(9)-Au(13)#1   | 176.3 |
| Au(11)-Au(9)-Au(14)     | 58.6  |
| Au(11)-Au(9)-Au(14)#1   | 113.9 |
| Au(11)-Au(9)-Au(15)     | 93.2  |
| Au(11)-Au(9)-Au(21)#1   | 124.7 |
| Au(13)#1-Au(9)-Au(1)    | 88.9  |
| Au(13)#1-Au(9)-Au(6)    | 116.2 |
| Au(13)#1-Au(9)-Au(8)    | 121.0 |
| Au(13)#1-Au(9)-Au(8)#1  | 62.7  |
| Au(13)#1-Au(9)-Au(10)   | 118.6 |
| Au(13)#1-Au(9)-Au(14)#1 | 63.1  |
| Au(13)#1-Au(9)-Au(14)   | 122.4 |
| Au(13)#1-Au(9)-Au(15)   | 90.3  |
| Au(14)-Au(9)-Au(1)      | 116.8 |
| Au(14)#1-Au(9)-Au(1)    | 58.6  |
| Au(14)-Au(9)-Au(6)      | 120.9 |
| Au(14)#1-Au(9)-Au(6)    | 114.6 |
| Au(14)#1-Au(9)-Au(8)    | 58.0  |
| Au(14)-Au(9)-Au(8)      | 58.1  |
| Au(14)#1-Au(9)-Au(10)   | 174.3 |
| Au(14)-Au(9)-Au(10)     | 96.3  |
| Au(14)#1-Au(9)-Au(14)   | 86.7  |
| Au(14)-Au(9)-Au(15)     | 62.0  |
| Au(14)#1-Au(9)-Au(15)   | 119.3 |
| Au(15)-Au(9)-Au(6)      | 126.1 |
| Au(15)-Au(9)-Au(8)      | 120.1 |
| Au(15)-Au(9)-Au(10)     | 66.4  |
| Au(21)#1-Au(9)-Au(1)    | 119.4 |
| Au(21)#1-Au(9)-Au(5)    | 57.4  |
| Au(21)#1-Au(9)-Au(6)    | 92.2  |
| Au(21)#1-Au(9)-Au(8)    | 178.1 |
| Au(21)#1-Au(9)-Au(8)#1  | 91.5  |



---

|                         |       |
|-------------------------|-------|
| Au(21)#1-Au(9)-Au(10)   | 60.7  |
| Au(21)#1-Au(9)-Au(13)#1 | 58.3  |
| Au(21)#1-Au(9)-Au(14)#1 | 121.4 |
| Au(21)#1-Au(9)-Au(14)   | 123.8 |
| Au(21)#1-Au(9)-Au(15)   | 61.7  |
| Au(6)-Au(10)-Au(9)      | 57.9  |
| Au(6)-Au(10)-Au(11)     | 57.5  |
| Au(6)-Au(10)-Au(15)     | 111.7 |
| Au(9)-Au(10)-Au(15)     | 53.8  |
| Au(11)-Au(10)-Au(9)     | 51.6  |
| Au(11)-Au(10)-Au(15)    | 79.0  |
| Au(21)#1-Au(10)-Au(6)   | 86.9  |
| Au(21)#1-Au(10)-Au(9)   | 53.7  |
| Au(21)#1-Au(10)-Au(11)  | 105.2 |
| Au(21)#1-Au(10)-Au(15)  | 54.9  |
| S(12)-Au(10)-Au(6)      | 138.6 |
| S(12)-Au(10)-Au(9)      | 91.3  |
| S(12)-Au(10)-Au(11)     | 82.1  |
| S(12)-Au(10)-Au(15)     | 45.4  |
| S(12)-Au(10)-Au(21)#1   | 96.5  |
| S(12)-Au(10)-S(13)      | 168.5 |
| S(13)-Au(10)-Au(6)      | 49.9  |
| S(13)-Au(10)-Au(9)      | 100.1 |
| S(13)-Au(10)-Au(11)     | 103.8 |
| S(13)-Au(10)-Au(15)     | 144.9 |
| S(13)-Au(10)-Au(21)#1   | 91.6  |
| Au(6)-Au(11)-Au(7)      | 53.2  |
| Au(6)-Au(11)-Au(10)     | 60.0  |
| Au(6)-Au(11)-Au(12)     | 111.9 |
| Au(7)-Au(11)-Au(10)     | 112.5 |
| Au(8)-Au(11)-Au(6)      | 93.0  |
| Au(8)-Au(11)-Au(7)      | 63.2  |
| Au(8)-Au(11)-Au(9)      | 67.3  |
| Au(8)-Au(11)-Au(10)     | 131.2 |
| Au(8)-Au(11)-Au(12)     | 66.5  |
| Au(8)-Au(11)-Au(14)     | 63.3  |
| Au(9)-Au(11)-Au(6)      | 63.3  |
| Au(9)-Au(11)-Au(7)      | 92.3  |

---

|                         |       |
|-------------------------|-------|
| Au(9)-Au(11)-Au(10)     | 64.3  |
| Au(9)-Au(11)-Au(12)     | 133.2 |
| Au(9)-Au(11)-Au(14)     | 63.2  |
| Au(12)-Au(11)-Au(7)     | 60.0  |
| Au(12)-Au(11)-Au(10)    | 157.9 |
| Au(14)-Au(11)-Au(6)     | 126.4 |
| Au(14)-Au(11)-Au(7)     | 126.3 |
| Au(14)-Au(11)-Au(10)    | 99.0  |
| Au(14)-Au(11)-Au(12)    | 101.6 |
| S(11)-Au(11)-Au(6)      | 86.6  |
| S(11)-Au(11)-Au(7)      | 97.9  |
| S(11)-Au(11)-Au(8)      | 155.5 |
| S(11)-Au(11)-Au(9)      | 132.4 |
| S(11)-Au(11)-Au(10)     | 68.9  |
| S(11)-Au(11)-Au(12)     | 90.9  |
| S(11)-Au(11)-Au(14)     | 134.6 |
| Au(7)-Au(12)-Au(8)      | 58.6  |
| Au(7)-Au(12)-Au(16)#1   | 85.9  |
| Au(11)-Au(12)-Au(7)     | 60.3  |
| Au(11)-Au(12)-Au(8)     | 52.2  |
| Au(11)-Au(12)-Au(16)#1  | 104.5 |
| Au(16)#1-Au(12)-Au(8)   | 52.5  |
| S(9)-Au(12)-Au(7)       | 49.6  |
| S(9)-Au(12)-Au(8)       | 103.9 |
| S(9)-Au(12)-Au(11)      | 103.0 |
| S(9)-Au(12)-Au(16)#1    | 98.7  |
| S(10)-Au(12)-Au(7)      | 140.9 |
| S(10)-Au(12)-Au(8)      | 89.7  |
| S(10)-Au(12)-Au(11)     | 82.7  |
| S(10)-Au(12)-Au(16)#1   | 92.0  |
| S(10)-Au(12)-S(9)       | 166.0 |
| Au(4)#1-Au(13)-Au(8)    | 115.1 |
| Au(4)#1-Au(13)-Au(14)   | 57.7  |
| Au(4)#1-Au(13)-Au(16)#1 | 171.1 |
| Au(4)#1-Au(13)-Au(17)#1 | 122.2 |
| Au(4)#1-Au(13)-Au(18)#1 | 63.1  |
| Au(5)#1-Au(13)-Au(4)#1  | 62.5  |
| Au(5)#1-Au(13)-Au(8)    | 119.7 |

---

|                          |       |
|--------------------------|-------|
| Au(5)#1-Au(13)-Au(9)#1   | 60.8  |
| Au(5)#1-Au(13)-Au(14)    | 91.5  |
| Au(5)#1-Au(13)-Au(16)#1  | 120.9 |
| Au(5)#1-Au(13)-Au(17)#1  | 90.0  |
| Au(5)#1-Au(13)-Au(18)#1  | 64.2  |
| Au(5)#1-Au(13)-Au(21)    | 58.9  |
| Au(8)-Au(13)-Au(14)      | 57.3  |
| Au(8)-Au(13)-Au(17)#1    | 122.6 |
| Au(8)-Au(13)-Au(18)#1    | 175.0 |
| Au(9)#1-Au(13)-Au(4)#1   | 88.2  |
| Au(9)#1-Au(13)-Au(8)     | 58.8  |
| Au(9)#1-Au(13)-Au(14)    | 58.7  |
| Au(9)#1-Au(13)-Au(16)#1  | 87.0  |
| Au(9)#1-Au(13)-Au(17)#1  | 123.0 |
| Au(9)#1-Au(13)-Au(18)#1  | 124.9 |
| Au(14)-Au(13)-Au(17)#1   | 178.2 |
| Au(14)-Au(13)-Au(18)#1   | 120.7 |
| Au(16)#1-Au(13)-Au(8)    | 56.1  |
| Au(16)#1-Au(13)-Au(14)   | 113.4 |
| Au(16)#1-Au(13)-Au(17)#1 | 66.6  |
| Au(16)#1-Au(13)-Au(18)#1 | 125.7 |
| Au(17)#1-Au(13)-Au(18)#1 | 59.1  |
| Au(21)-Au(13)-Au(4)#1    | 121.2 |
| Au(21)-Au(13)-Au(8)      | 90.0  |
| Au(21)-Au(13)-Au(9)#1    | 59.6  |
| Au(21)-Au(13)-Au(14)     | 118.3 |
| Au(21)-Au(13)-Au(16)#1   | 62.1  |
| Au(21)-Au(13)-Au(17)#1   | 63.4  |
| Au(21)-Au(13)-Au(18)#1   | 94.8  |
| S(10)-Au(13)-Au(4)#1     | 84.4  |
| S(10)-Au(13)-Au(5)#1     | 140.8 |
| S(10)-Au(13)-Au(8)       | 92.1  |
| S(10)-Au(13)-Au(9)#1     | 143.1 |
| S(10)-Au(13)-Au(14)      | 87.2  |
| S(10)-Au(13)-Au(16)#1    | 95.1  |
| S(10)-Au(13)-Au(17)#1    | 90.9  |
| S(10)-Au(13)-Au(18)#1    | 83.1  |
| S(10)-Au(13)-Au(21)      | 150.3 |

---

|                        |       |
|------------------------|-------|
| Au(1)#1-Au(14)-Au(3)#1 | 57.6  |
| Au(1)#1-Au(14)-Au(4)#1 | 57.1  |
| Au(1)#1-Au(14)-Au(8)#1 | 61.5  |
| Au(1)#1-Au(14)-Au(8)   | 121.2 |
| Au(1)#1-Au(14)-Au(9)#1 | 61.2  |
| Au(1)#1-Au(14)-Au(9)   | 121.4 |
| Au(1)#1-Au(14)-Au(13)  | 87.6  |
| Au(1)#1-Au(14)-Au(15)  | 88.9  |
| Au(3)#1-Au(14)-Au(4)#1 | 56.0  |
| Au(3)#1-Au(14)-Au(8)#1 | 89.3  |
| Au(3)#1-Au(14)-Au(8)   | 176.4 |
| Au(3)#1-Au(14)-Au(9)#1 | 118.7 |
| Au(3)#1-Au(14)-Au(9)   | 120.1 |
| Au(3)#1-Au(14)-Au(13)  | 115.4 |
| Au(3)#1-Au(14)-Au(15)  | 60.1  |
| Au(4)#1-Au(14)-Au(8)#1 | 118.5 |
| Au(4)#1-Au(14)-Au(8)   | 120.3 |
| Au(4)#1-Au(14)-Au(9)   | 176.2 |
| Au(4)#1-Au(14)-Au(9)#1 | 88.8  |
| Au(4)#1-Au(14)-Au(13)  | 59.4  |
| Au(4)#1-Au(14)-Au(15)  | 116.2 |
| Au(8)#1-Au(14)-Au(8)   | 92.9  |
| Au(8)#1-Au(14)-Au(9)#1 | 63.6  |
| Au(8)-Au(14)-Au(9)#1   | 59.9  |
| Au(8)-Au(14)-Au(9)     | 63.5  |
| Au(8)#1-Au(14)-Au(9)   | 59.9  |
| Au(8)-Au(14)-Au(13)    | 60.9  |
| Au(8)#1-Au(14)-Au(13)  | 121.7 |
| Au(8)-Au(14)-Au(15)    | 123.5 |
| Au(8)#1-Au(14)-Au(15)  | 58.7  |
| Au(9)#1-Au(14)-Au(9)   | 93.3  |
| Au(9)-Au(14)-Au(13)    | 124.4 |
| Au(9)#1-Au(14)-Au(13)  | 58.2  |
| Au(9)#1-Au(14)-Au(15)  | 122.3 |
| Au(9)-Au(14)-Au(15)    | 60.0  |
| Au(11)-Au(14)-Au(1)#1  | 178.8 |
| Au(11)-Au(14)-Au(3)#1  | 123.6 |
| Au(11)-Au(14)-Au(4)#1  | 123.4 |

---

|                         |       |
|-------------------------|-------|
| Au(11)-Au(14)-Au(8)     | 57.7  |
| Au(11)-Au(14)-Au(8)#1   | 118.1 |
| Au(11)-Au(14)-Au(9)     | 58.2  |
| Au(11)-Au(14)-Au(9)#1   | 117.6 |
| Au(11)-Au(14)-Au(13)    | 91.8  |
| Au(11)-Au(14)-Au(15)    | 91.7  |
| Au(15)-Au(14)-Au(13)    | 175.5 |
| Au(2)#1-Au(15)-Au(3)#1  | 61.2  |
| Au(2)#1-Au(15)-Au(8)#1  | 61.4  |
| Au(2)#1-Au(15)-Au(9)    | 120.5 |
| Au(2)#1-Au(15)-Au(10)   | 178.9 |
| Au(2)#1-Au(15)-Au(14)   | 90.9  |
| Au(2)#1-Au(15)-Au(19)#1 | 61.7  |
| Au(2)#1-Au(15)-Au(20)#1 | 91.3  |
| Au(2)#1-Au(15)-Au(21)#1 | 122.2 |
| Au(3)#1-Au(15)-Au(9)    | 115.0 |
| Au(3)#1-Au(15)-Au(10)   | 119.7 |
| Au(3)#1-Au(15)-Au(14)   | 57.0  |
| Au(3)#1-Au(15)-Au(19)#1 | 63.4  |
| Au(3)#1-Au(15)-Au(20)#1 | 125.5 |
| Au(3)#1-Au(15)-Au(21)#1 | 171.6 |
| Au(8)#1-Au(15)-Au(3)#1  | 87.2  |
| Au(8)#1-Au(15)-Au(9)    | 59.1  |
| Au(8)#1-Au(15)-Au(10)   | 118.9 |
| Au(8)#1-Au(15)-Au(14)   | 58.3  |
| Au(8)#1-Au(15)-Au(19)#1 | 123.0 |
| Au(8)#1-Au(15)-Au(20)#1 | 121.7 |
| Au(8)#1-Au(15)-Au(21)#1 | 88.3  |
| Au(9)-Au(15)-Au(10)     | 59.8  |
| Au(9)-Au(15)-Au(14)     | 58.0  |
| Au(9)-Au(15)-Au(19)#1   | 176.7 |
| Au(9)-Au(15)-Au(20)#1   | 119.5 |
| Au(9)-Au(15)-Au(21)#1   | 56.6  |
| Au(14)-Au(15)-Au(10)    | 90.1  |
| Au(14)-Au(15)-Au(19)#1  | 120.4 |
| Au(14)-Au(15)-Au(20)#1  | 177.3 |
| Au(16)-Au(15)-Au(2)#1   | 60.0  |
| Au(16)-Au(15)-Au(3)#1   | 120.8 |

---

|                          |       |
|--------------------------|-------|
| Au(16)-Au(15)-Au(8)#1    | 59.4  |
| Au(16)-Au(15)-Au(9)      | 89.3  |
| Au(16)-Au(15)-Au(10)     | 119.2 |
| Au(16)-Au(15)-Au(14)     | 117.6 |
| Au(16)-Au(15)-Au(19)#1   | 94.0  |
| Au(16)-Au(15)-Au(20)#1   | 62.3  |
| Au(16)-Au(15)-Au(21)#1   | 62.3  |
| Au(19)#1-Au(15)-Au(10)   | 118.1 |
| Au(19)#1-Au(15)-Au(20)#1 | 62.2  |
| Au(20)#1-Au(15)-Au(10)   | 87.7  |
| Au(21)#1-Au(15)-Au(10)   | 57.0  |
| Au(21)#1-Au(15)-Au(14)   | 114.6 |
| Au(21)#1-Au(15)-Au(19)#1 | 125.0 |
| Au(21)#1-Au(15)-Au(20)#1 | 62.9  |
| S(12)-Au(15)-Au(2)#1     | 137.8 |
| S(12)-Au(15)-Au(3)#1     | 83.7  |
| S(12)-Au(15)-Au(8)#1     | 144.6 |
| S(12)-Au(15)-Au(9)       | 94.4  |
| S(12)-Au(15)-Au(10)      | 42.7  |
| S(12)-Au(15)-Au(14)      | 88.6  |
| S(12)-Au(15)-Au(16)      | 150.6 |
| S(12)-Au(15)-Au(19)#1    | 82.6  |
| S(12)-Au(15)-Au(20)#1    | 90.9  |
| S(12)-Au(15)-Au(21)#1    | 95.9  |
| Au(2)#1-Au(16)-Au(8)#1   | 62.8  |
| Au(2)#1-Au(16)-Au(12)#1  | 89.0  |
| Au(2)#1-Au(16)-Au(13)#1  | 125.5 |
| Au(2)#1-Au(16)-Au(15)    | 60.1  |
| Au(2)#1-Au(16)-Au(17)    | 175.2 |
| Au(2)#1-Au(16)-Au(20)#1  | 93.6  |
| Au(2)#1-Au(16)-Au(21)#1  | 122.6 |
| Au(8)#1-Au(16)-Au(12)#1  | 64.1  |
| Au(8)#1-Au(16)-Au(13)#1  | 62.8  |
| Au(8)#1-Au(16)-Au(17)    | 122.1 |
| Au(8)#1-Au(16)-Au(20)#1  | 129.3 |
| Au(8)#1-Au(16)-Au(21)#1  | 90.4  |
| Au(12)#1-Au(16)-Au(17)   | 93.4  |
| Au(13)#1-Au(16)-Au(12)#1 | 69.4  |

---

|                          |       |
|--------------------------|-------|
| Au(13)#1-Au(16)-Au(17)   | 59.3  |
| Au(13)#1-Au(16)-Au(20)#1 | 119.3 |
| Au(13)#1-Au(16)-Au(21)#1 | 55.9  |
| Au(15)-Au(16)-Au(8)#1    | 63.1  |
| Au(15)-Au(16)-Au(12)#1   | 126.6 |
| Au(15)-Au(16)-Au(13)#1   | 93.2  |
| Au(15)-Au(16)-Au(17)     | 121.1 |
| Au(15)-Au(16)-Au(20)#1   | 66.3  |
| Au(15)-Au(16)-Au(21)#1   | 62.6  |
| Au(20)#1-Au(16)-Au(12)#1 | 165.6 |
| Au(20)#1-Au(16)-Au(17)   | 82.9  |
| Au(21)#1-Au(16)-Au(12)#1 | 125.3 |
| Au(21)#1-Au(16)-Au(17)   | 58.9  |
| Au(21)#1-Au(16)-Au(20)#1 | 64.3  |
| S(1)-Au(16)-Au(2)#1      | 133.5 |
| S(1)-Au(16)-Au(8)#1      | 140.8 |
| S(1)-Au(16)-Au(12)#1     | 79.4  |
| S(1)-Au(16)-Au(13)#1     | 92.2  |
| S(1)-Au(16)-Au(15)       | 153.6 |
| S(1)-Au(16)-Au(17)       | 43.2  |
| S(1)-Au(16)-Au(20)#1     | 88.6  |
| S(1)-Au(16)-Au(21)#1     | 100.0 |
| Au(13)#1-Au(17)-Au(16)   | 54.1  |
| Au(13)#1-Au(17)-Au(18)   | 62.8  |
| Au(18)-Au(17)-Au(16)     | 116.8 |
| Au(21)#1-Au(17)-Au(13)#1 | 52.6  |
| Au(21)#1-Au(17)-Au(16)   | 54.3  |
| Au(21)#1-Au(17)-Au(18)   | 90.7  |
| S(1)-Au(17)-Au(13)#1     | 88.4  |
| S(1)-Au(17)-Au(16)       | 44.2  |
| S(1)-Au(17)-Au(18)       | 136.7 |
| S(1)-Au(17)-Au(21)#1     | 96.5  |
| S(1)-Au(17)-S(2)         | 167.5 |
| S(2)-Au(17)-Au(13)#1     | 101.7 |
| S(2)-Au(17)-Au(16)       | 148.2 |
| S(2)-Au(17)-Au(18)       | 46.5  |
| S(2)-Au(17)-Au(21)#1     | 95.5  |
| Au(4)-Au(18)-Au(13)#1    | 53.0  |

---

|                          |       |
|--------------------------|-------|
| Au(5)-Au(18)-Au(4)       | 54.1  |
| Au(5)-Au(18)-Au(13)#1    | 50.2  |
| Au(17)-Au(18)-Au(4)      | 111.1 |
| Au(17)-Au(18)-Au(5)      | 81.4  |
| Au(17)-Au(18)-Au(13)#1   | 58.1  |
| S(2)-Au(18)-Au(4)        | 141.2 |
| S(2)-Au(18)-Au(5)        | 88.0  |
| S(2)-Au(18)-Au(13)#1     | 98.1  |
| S(2)-Au(18)-Au(17)       | 47.3  |
| S(2)-Au(18)-S(3)         | 171.8 |
| S(3)-Au(18)-Au(4)        | 45.8  |
| S(3)-Au(18)-Au(5)        | 99.5  |
| S(3)-Au(18)-Au(13)#1     | 84.6  |
| S(3)-Au(18)-Au(17)       | 130.6 |
| Au(2)-Au(19)-Au(3)       | 55.3  |
| Au(2)-Au(19)-Au(15)#1    | 52.7  |
| Au(2)-Au(19)-Au(20)      | 85.0  |
| Au(3)-Au(19)-Au(20)      | 115.2 |
| Au(15)#1-Au(19)-Au(3)    | 55.2  |
| Au(15)#1-Au(19)-Au(20)   | 60.0  |
| S(5)-Au(19)-Au(2)        | 101.8 |
| S(5)-Au(19)-Au(3)        | 47.5  |
| S(5)-Au(19)-Au(15)#1     | 89.4  |
| S(5)-Au(19)-Au(20)       | 135.6 |
| S(6)-Au(19)-Au(2)        | 80.6  |
| S(6)-Au(19)-Au(3)        | 134.9 |
| S(6)-Au(19)-Au(15)#1     | 92.4  |
| S(6)-Au(19)-Au(20)       | 44.7  |
| S(6)-Au(19)-S(5)         | 177.6 |
| Au(15)#1-Au(20)-Au(19)   | 57.9  |
| Au(15)#1-Au(20)-Au(21)   | 54.8  |
| Au(16)#1-Au(20)-Au(15)#1 | 51.4  |
| Au(16)#1-Au(20)-Au(19)   | 84.8  |
| Au(16)#1-Au(20)-Au(21)   | 55.6  |
| Au(21)-Au(20)-Au(19)     | 112.6 |
| S(6)-Au(20)-Au(15)#1     | 89.7  |
| S(6)-Au(20)-Au(16)#1     | 82.1  |
| S(6)-Au(20)-Au(19)       | 43.4  |



---

|                          |       |
|--------------------------|-------|
| S(6)-Au(20)-Au(21)       | 135.6 |
| S(7)-Au(20)-Au(15)#1     | 92.7  |
| S(7)-Au(20)-Au(16)#1     | 99.4  |
| S(7)-Au(20)-Au(19)       | 138.4 |
| S(7)-Au(20)-Au(21)       | 46.4  |
| S(7)-Au(20)-S(6)         | 177.6 |
| Au(5)#1-Au(21)-Au(9)#1   | 62.2  |
| Au(5)#1-Au(21)-Au(10)#1  | 89.6  |
| Au(5)#1-Au(21)-Au(13)    | 60.5  |
| Au(5)#1-Au(21)-Au(15)#1  | 123.9 |
| Au(5)#1-Au(21)-Au(16)#1  | 122.4 |
| Au(5)#1-Au(21)-Au(17)#1  | 91.2  |
| Au(5)#1-Au(21)-Au(20)    | 173.8 |
| Au(9)#1-Au(21)-Au(10)#1  | 65.6  |
| Au(9)#1-Au(21)-Au(15)#1  | 61.6  |
| Au(9)#1-Au(21)-Au(16)#1  | 88.2  |
| Au(9)#1-Au(21)-Au(17)#1  | 126.1 |
| Au(9)#1-Au(21)-Au(20)    | 124.0 |
| Au(10)#1-Au(21)-Au(17)#1 | 166.7 |
| Au(10)#1-Au(21)-Au(20)   | 93.2  |
| Au(13)-Au(21)-Au(9)#1    | 62.1  |
| Au(13)-Au(21)-Au(10)#1   | 127.2 |
| Au(13)-Au(21)-Au(15)#1   | 92.4  |
| Au(13)-Au(21)-Au(16)#1   | 62.0  |
| Au(13)-Au(21)-Au(17)#1   | 64.0  |
| Au(13)-Au(21)-Au(20)     | 121.2 |
| Au(15)#1-Au(21)-Au(10)#1 | 68.2  |
| Au(15)#1-Au(21)-Au(17)#1 | 121.6 |
| Au(15)#1-Au(21)-Au(20)   | 62.3  |
| Au(16)#1-Au(21)-Au(10)#1 | 123.3 |
| Au(16)#1-Au(21)-Au(15)#1 | 55.2  |
| Au(16)#1-Au(21)-Au(17)#1 | 66.8  |
| Au(16)#1-Au(21)-Au(20)   | 60.1  |
| Au(17)#1-Au(21)-Au(20)   | 84.8  |
| S(7)-Au(21)-Au(5)#1      | 130.8 |
| S(7)-Au(21)-Au(9)#1      | 146.1 |
| S(7)-Au(21)-Au(10)#1     | 82.2  |
| S(7)-Au(21)-Au(13)       | 150.5 |

---

|                      |       |
|----------------------|-------|
| S(7)-Au(21)-Au(15)#1 | 97.7  |
| S(7)-Au(21)-Au(16)#1 | 101.9 |
| S(7)-Au(21)-Au(17)#1 | 87.3  |
| S(7)-Au(21)-Au(20)   | 44.4  |
| Au(1)-Au(22)-Au(6)   | 62.0  |
| Au(1)-Au(22)-Au(7)   | 60.9  |
| Au(1)-Au(22)-Au(23)  | 73.0  |
| Au(1)-Au(22)-Au(24)  | 74.3  |
| Au(1)-Au(22)-Au(26)  | 141.2 |
| Au(6)-Au(22)-Au(7)   | 59.3  |
| Au(6)-Au(22)-Au(23)  | 134.9 |
| Au(6)-Au(22)-Au(24)  | 98.3  |
| Au(6)-Au(22)-Au(26)  | 90.3  |
| Au(7)-Au(22)-Au(23)  | 96.9  |
| Au(7)-Au(22)-Au(24)  | 135.2 |
| Au(7)-Au(22)-Au(26)  | 82.0  |
| Au(23)-Au(22)-Au(24) | 71.1  |
| Au(23)-Au(22)-Au(26) | 126.3 |
| Au(26)-Au(22)-Au(24) | 140.4 |
| S(15)-Au(22)-Au(1)   | 169.1 |
| S(15)-Au(22)-Au(6)   | 126.6 |
| S(15)-Au(22)-Au(7)   | 128.0 |
| S(15)-Au(22)-Au(23)  | 98.4  |
| S(15)-Au(22)-Au(24)  | 96.7  |
| S(15)-Au(22)-Au(26)  | 49.5  |
| Au(2)-Au(23)-Au(1)   | 54.1  |
| Au(3)-Au(23)-Au(1)   | 50.6  |
| Au(3)-Au(23)-Au(2)   | 53.9  |
| Au(22)-Au(23)-Au(1)  | 51.5  |
| Au(22)-Au(23)-Au(2)  | 83.9  |
| Au(22)-Au(23)-Au(3)  | 102.0 |
| S(4)-Au(23)-Au(1)    | 96.8  |
| S(4)-Au(23)-Au(2)    | 141.6 |
| S(4)-Au(23)-Au(3)    | 88.8  |
| S(4)-Au(23)-Au(22)   | 96.9  |
| S(8)-Au(23)-Au(1)    | 90.2  |
| S(8)-Au(23)-Au(2)    | 46.4  |
| S(8)-Au(23)-Au(3)    | 98.7  |

---

|                     |       |
|---------------------|-------|
| S(8)-Au(23)-Au(22)  | 84.3  |
| S(8)-Au(23)-S(4)    | 171.9 |
| Au(4)-Au(24)-Au(5)  | 57.0  |
| Au(22)-Au(24)-Au(4) | 98.7  |
| Au(22)-Au(24)-Au(5) | 80.4  |
| S(4)-Au(24)-Au(4)   | 85.8  |
| S(4)-Au(24)-Au(5)   | 140.1 |
| S(4)-Au(24)-Au(22)  | 92.6  |
| S(14)-Au(24)-Au(4)  | 99.1  |
| S(14)-Au(24)-Au(5)  | 48.5  |
| S(14)-Au(24)-Au(22) | 96.4  |
| S(14)-Au(24)-S(4)   | 169.0 |
| S(11)-Au(25)-Au(7)  | 93.3  |
| S(16)-Au(25)-Au(7)  | 93.7  |
| S(16)-Au(25)-S(11)  | 172.3 |
| S(15)-Au(26)-Au(22) | 51.6  |
| S(15)-Au(26)-S(16)  | 177.6 |
| S(16)-Au(26)-Au(22) | 127.4 |
| Au(17)-S(1)-Au(16)  | 92.5  |
| C(1)-S(1)-Au(16)    | 114.1 |
| C(1)-S(1)-Au(17)    | 99.8  |
| Au(18)-S(2)-Au(17)  | 86.3  |
| C(9)-S(2)-Au(17)    | 95.2  |
| C(9)-S(2)-Au(18)    | 91.8  |
| Au(18)-S(3)-Au(4)   | 89.0  |
| C(17)-S(3)-Au(4)    | 113.4 |
| C(17)-S(3)-Au(18)   | 111.6 |
| Au(23)-S(4)-Au(24)  | 95.1  |
| C(25)-S(4)-Au(23)   | 104.0 |
| C(25)-S(4)-Au(24)   | 104.4 |
| Au(19)-S(5)-Au(3)   | 87.1  |
| C(33)-S(5)-Au(3)    | 133.0 |
| C(33)-S(5)-Au(19)   | 92.2  |
| Au(19)-S(6)-Au(20)  | 91.9  |
| C(41)-S(6)-Au(19)   | 119.5 |
| C(41)-S(6)-Au(20)   | 108.2 |
| Au(20)-S(7)-Au(21)  | 89.1  |
| C(49)-S(7)-Au(20)   | 146.9 |

---

|                     |       |
|---------------------|-------|
| C(49)-S(7)-Au(21)   | 109.9 |
| Au(23)-S(8)-Au(2)   | 90.5  |
| C(57)-S(8)-Au(2)    | 114.5 |
| C(57)-S(8)-Au(23)   | 100.6 |
| Au(12)-S(9)-Au(7)   | 81.6  |
| C(65)-S(9)-Au(7)    | 115.0 |
| C(65)-S(9)-Au(12)   | 108.0 |
| Au(12)-S(10)-Au(13) | 95.7  |
| C(73)-S(10)-Au(12)  | 100.3 |
| C(73)-S(10)-Au(13)  | 113.1 |
| Au(25)-S(11)-Au(11) | 100.3 |
| C(81)-S(11)-Au(11)  | 112.4 |
| C(81)-S(11)-Au(25)  | 107.3 |
| Au(10)-S(12)-Au(15) | 92.0  |
| C(89)-S(12)-Au(10)  | 104.5 |
| C(89)-S(12)-Au(15)  | 114.2 |
| Au(10)-S(13)-Au(6)  | 82.6  |
| C(97)-S(13)-Au(6)   | 138.3 |
| C(97)-S(13)-Au(10)  | 91.2  |
| Au(24)-S(14)-Au(5)  | 85.0  |
| C(105)-S(14)-Au(5)  | 121.1 |
| C(105)-S(14)-Au(24) | 106.8 |
| Au(26)-S(15)-Au(22) | 78.9  |
| C(113)-S(15)-Au(22) | 115.3 |
| C(113)-S(15)-Au(26) | 110.6 |
| Au(25)-S(16)-Au(26) | 102.2 |
| C(121)-S(16)-Au(25) | 103.7 |
| C(121)-S(16)-Au(26) | 147.4 |
| S(1)-C(1)-H(1A)     | 109.0 |
| S(1)-C(1)-H(1B)     | 109.0 |
| H(1A)-C(1)-H(1B)    | 107.8 |
| C(2)-C(1)-S(1)      | 113.0 |
| C(2)-C(1)-H(1A)     | 109.0 |
| C(2)-C(1)-H(1B)     | 109.0 |
| C(1)-C(2)-H(2A)     | 107.3 |
| C(1)-C(2)-H(2B)     | 107.3 |
| C(1)-C(2)-C(3)      | 120.3 |
| H(2A)-C(2)-H(2B)    | 106.9 |

---

|                     |       |
|---------------------|-------|
| C(3)-C(2)-H(2A)     | 107.3 |
| C(3)-C(2)-H(2B)     | 107.3 |
| C(8)-C(3)-C(2)      | 113.4 |
| C(8)-C(3)-C(4)      | 120.0 |
| C(4)-C(3)-C(2)      | 126.2 |
| C(3)-C(8)-H(8)      | 120.0 |
| C(7)-C(8)-C(3)      | 120.0 |
| C(7)-C(8)-H(8)      | 120.0 |
| C(8)-C(7)-H(7)      | 120.0 |
| C(8)-C(7)-C(6)      | 120.0 |
| C(6)-C(7)-H(7)      | 120.0 |
| C(7)-C(6)-H(6)      | 120.0 |
| C(5)-C(6)-C(7)      | 120.0 |
| C(5)-C(6)-H(6)      | 120.0 |
| C(6)-C(5)-H(5)      | 120.0 |
| C(6)-C(5)-C(4)      | 120.0 |
| C(4)-C(5)-H(5)      | 120.0 |
| C(3)-C(4)-H(4)      | 120.0 |
| C(5)-C(4)-C(3)      | 120.0 |
| C(5)-C(4)-H(4)      | 120.0 |
| S(2)-C(9)-H(9A)     | 101.7 |
| S(2)-C(9)-H(9B)     | 101.7 |
| H(9A)-C(9)-H(9B)    | 104.7 |
| C(10)-C(9)-S(2)     | 141.4 |
| C(10)-C(9)-H(9A)    | 101.7 |
| C(10)-C(9)-H(9B)    | 101.7 |
| C(11)-C(10)-C(9)    | 86.8  |
| C(13)-C(12)-C(11)   | 120.0 |
| C(12)-C(13)-C(14)   | 120.0 |
| C(15)-C(14)-C(13)   | 120.0 |
| C(14)-C(15)-C(16)   | 120.0 |
| C(15)-C(16)-C(11)   | 120.0 |
| C(12)-C(11)-C(10)   | 121.5 |
| C(16)-C(11)-C(10)   | 118.4 |
| C(16)-C(11)-C(12)   | 120.0 |
| S(3)-C(17)-H(17A)   | 108.2 |
| S(3)-C(17)-H(17B)   | 108.2 |
| H(17A)-C(17)-H(17B) | 107.3 |

---

|                     |       |
|---------------------|-------|
| C(18)-C(17)-S(3)    | 116.4 |
| C(18)-C(17)-H(17A)  | 108.2 |
| C(18)-C(17)-H(17B)  | 108.2 |
| C(17)-C(18)-H(18A)  | 109.8 |
| C(17)-C(18)-H(18B)  | 109.8 |
| H(18A)-C(18)-H(18B) | 108.3 |
| C(19)-C(18)-C(17)   | 109.2 |
| C(19)-C(18)-H(18A)  | 109.8 |
| C(19)-C(18)-H(18B)  | 109.8 |
| C(20)-C(19)-C(18)   | 122.6 |
| C(20)-C(19)-C(24)   | 120.0 |
| C(24)-C(19)-C(18)   | 117.2 |
| C(19)-C(20)-H(20)   | 120.0 |
| C(19)-C(20)-C(21)   | 120.0 |
| C(21)-C(20)-H(20)   | 120.0 |
| C(20)-C(21)-H(21)   | 120.0 |
| C(20)-C(21)-C(22)   | 120.0 |
| C(22)-C(21)-H(21)   | 120.0 |
| C(21)-C(22)-H(22)   | 120.0 |
| C(23)-C(22)-C(21)   | 120.0 |
| C(23)-C(22)-H(22)   | 120.0 |
| C(22)-C(23)-H(23)   | 120.0 |
| C(22)-C(23)-C(24)   | 120.0 |
| C(24)-C(23)-H(23)   | 120.0 |
| C(19)-C(24)-H(24)   | 120.0 |
| C(23)-C(24)-C(19)   | 120.0 |
| C(23)-C(24)-H(24)   | 120.0 |
| C(26)-C(25)-S(4)    | 113.7 |
| C(27)-C(26)-C(25)   | 104.3 |
| C(32)-C(27)-C(26)   | 105.5 |
| C(32)-C(27)-C(28)   | 120.0 |
| C(28)-C(27)-C(26)   | 133.7 |
| C(27)-C(32)-H(32)   | 120.0 |
| C(27)-C(32)-C(31)   | 120.0 |
| C(31)-C(32)-H(32)   | 120.0 |
| C(32)-C(31)-H(31)   | 120.0 |
| C(30)-C(31)-C(32)   | 120.0 |
| C(30)-C(31)-H(31)   | 120.0 |

---

|                     |       |
|---------------------|-------|
| C(31)-C(30)-H(30)   | 120.0 |
| C(29)-C(30)-C(31)   | 120.0 |
| C(29)-C(30)-H(30)   | 120.0 |
| C(30)-C(29)-H(29)   | 120.0 |
| C(28)-C(29)-C(30)   | 120.0 |
| C(28)-C(29)-H(29)   | 120.0 |
| C(27)-C(28)-H(28)   | 120.0 |
| C(29)-C(28)-C(27)   | 120.0 |
| C(29)-C(28)-H(28)   | 120.0 |
| S(5)-C(33)-H(33A)   | 107.1 |
| S(5)-C(33)-H(33B)   | 107.1 |
| H(33A)-C(33)-H(33B) | 106.8 |
| C(34)-C(33)-S(5)    | 120.8 |
| C(34)-C(33)-H(33A)  | 107.1 |
| C(34)-C(33)-H(33B)  | 107.1 |
| C(35)-C(34)-C(33)   | 115.3 |
| C(40)-C(35)-C(34)   | 130.1 |
| C(40)-C(35)-C(36)   | 120.0 |
| C(36)-C(35)-C(34)   | 109.8 |
| C(39)-C(40)-C(35)   | 120.0 |
| C(40)-C(39)-C(38)   | 120.0 |
| C(39)-C(38)-C(37)   | 120.0 |
| C(36)-C(37)-C(38)   | 120.0 |
| C(37)-C(36)-C(35)   | 120.0 |
| S(6)-C(41)-H(41A)   | 111.8 |
| S(6)-C(41)-H(41B)   | 111.8 |
| H(41A)-C(41)-H(41B) | 109.5 |
| C(42)-C(41)-S(6)    | 100.0 |
| C(42)-C(41)-H(41A)  | 111.8 |
| C(42)-C(41)-H(41B)  | 111.8 |
| C(41)-C(42)-C(43)   | 106.6 |
| C(47)-C(48)-C(43)   | 120.0 |
| C(48)-C(47)-C(46)   | 120.0 |
| C(45)-C(46)-C(47)   | 120.0 |
| C(46)-C(45)-C(44)   | 120.0 |
| C(45)-C(44)-C(43)   | 120.0 |
| C(48)-C(43)-C(42)   | 104.5 |
| C(44)-C(43)-C(42)   | 126.9 |

---

|                     |       |
|---------------------|-------|
| C(44)-C(43)-C(48)   | 120.0 |
| S(7)-C(49)-H(49A)   | 112.1 |
| S(7)-C(49)-H(49B)   | 112.1 |
| H(49A)-C(49)-H(49B) | 109.7 |
| C(50)-C(49)-S(7)    | 98.6  |
| C(50)-C(49)-H(49A)  | 112.1 |
| C(50)-C(49)-H(49B)  | 112.1 |
| C(49)-C(50)-H(50A)  | 110.6 |
| C(49)-C(50)-H(50B)  | 110.6 |
| C(49)-C(50)-C(51)   | 105.8 |
| H(50A)-C(50)-H(50B) | 108.7 |
| C(51)-C(50)-H(50A)  | 110.6 |
| C(51)-C(50)-H(50B)  | 110.6 |
| C(53)-C(52)-H(52)   | 120.0 |
| C(53)-C(52)-C(51)   | 120.0 |
| C(51)-C(52)-H(52)   | 120.0 |
| C(52)-C(53)-H(53)   | 120.0 |
| C(52)-C(53)-C(54)   | 120.0 |
| C(54)-C(53)-H(53)   | 120.0 |
| C(53)-C(54)-H(54)   | 120.0 |
| C(53)-C(54)-C(55)   | 120.0 |
| C(55)-C(54)-H(54)   | 120.0 |
| C(54)-C(55)-H(55)   | 120.0 |
| C(56)-C(55)-C(54)   | 120.0 |
| C(56)-C(55)-H(55)   | 120.0 |
| C(55)-C(56)-H(56)   | 120.0 |
| C(51)-C(56)-C(55)   | 120.0 |
| C(51)-C(56)-H(56)   | 120.0 |
| C(52)-C(51)-C(50)   | 135.4 |
| C(56)-C(51)-C(50)   | 104.6 |
| C(56)-C(51)-C(52)   | 120.0 |
| S(8)-C(57)-H(57A)   | 108.4 |
| S(8)-C(57)-H(57B)   | 108.4 |
| H(57A)-C(57)-H(57B) | 107.4 |
| C(58)-C(57)-S(8)    | 115.6 |
| C(58)-C(57)-H(57A)  | 108.4 |
| C(58)-C(57)-H(57B)  | 108.4 |
| C(57)-C(58)-H(58A)  | 109.2 |



---

|                     |       |
|---------------------|-------|
| C(57)-C(58)-H(58B)  | 109.2 |
| C(57)-C(58)-C(59)   | 112.1 |
| H(58A)-C(58)-H(58B) | 107.9 |
| C(59)-C(58)-H(58A)  | 109.2 |
| C(59)-C(58)-H(58B)  | 109.2 |
| C(60)-C(59)-C(58)   | 121.3 |
| C(60)-C(59)-C(64)   | 120.0 |
| C(64)-C(59)-C(58)   | 118.7 |
| C(59)-C(60)-H(60)   | 120.0 |
| C(61)-C(60)-C(59)   | 120.0 |
| C(61)-C(60)-H(60)   | 120.0 |
| C(60)-C(61)-H(61)   | 120.0 |
| C(60)-C(61)-C(62)   | 120.0 |
| C(62)-C(61)-H(61)   | 120.0 |
| C(61)-C(62)-H(62)   | 120.0 |
| C(61)-C(62)-C(63)   | 120.0 |
| C(63)-C(62)-H(62)   | 120.0 |
| C(62)-C(63)-H(63)   | 120.0 |
| C(64)-C(63)-C(62)   | 120.0 |
| C(64)-C(63)-H(63)   | 120.0 |
| C(59)-C(64)-H(64)   | 120.0 |
| C(63)-C(64)-C(59)   | 120.0 |
| C(63)-C(64)-H(64)   | 120.0 |
| S(9)-C(65)-H(65A)   | 109.1 |
| S(9)-C(65)-H(65B)   | 109.1 |
| H(65A)-C(65)-H(65B) | 107.9 |
| C(66)-C(65)-S(9)    | 112.3 |
| C(66)-C(65)-H(65A)  | 109.1 |
| C(66)-C(65)-H(65B)  | 109.1 |
| C(65)-C(66)-C(67)   | 119.2 |
| C(72)-C(67)-C(66)   | 119.1 |
| C(72)-C(67)-C(68)   | 120.0 |
| C(68)-C(67)-C(66)   | 120.5 |
| C(67)-C(72)-H(72)   | 120.0 |
| C(71)-C(72)-C(67)   | 120.0 |
| C(71)-C(72)-H(72)   | 120.0 |
| C(72)-C(71)-H(71)   | 120.0 |
| C(70)-C(71)-C(72)   | 120.0 |

---

|                     |       |
|---------------------|-------|
| C(70)-C(71)-H(71)   | 120.0 |
| C(71)-C(70)-H(70)   | 120.0 |
| C(71)-C(70)-C(69)   | 120.0 |
| C(69)-C(70)-H(70)   | 120.0 |
| C(70)-C(69)-H(69)   | 120.0 |
| C(68)-C(69)-C(70)   | 120.0 |
| C(68)-C(69)-H(69)   | 120.0 |
| C(67)-C(68)-H(68)   | 120.0 |
| C(69)-C(68)-C(67)   | 120.0 |
| C(69)-C(68)-H(68)   | 120.0 |
| S(10)-C(73)-H(73A)  | 109.0 |
| S(10)-C(73)-H(73B)  | 109.0 |
| H(73A)-C(73)-H(73B) | 107.8 |
| C(74)-C(73)-S(10)   | 112.8 |
| C(74)-C(73)-H(73A)  | 109.0 |
| C(74)-C(73)-H(73B)  | 109.0 |
| C(75)-C(74)-C(73)   | 113.9 |
| C(76)-C(75)-C(74)   | 122.7 |
| C(76)-C(75)-C(80)   | 120.0 |
| C(80)-C(75)-C(74)   | 117.3 |
| C(75)-C(76)-H(76)   | 120.0 |
| C(75)-C(76)-C(77)   | 120.0 |
| C(77)-C(76)-H(76)   | 120.0 |
| C(76)-C(77)-H(77)   | 120.0 |
| C(78)-C(77)-C(76)   | 120.0 |
| C(78)-C(77)-H(77)   | 120.0 |
| C(77)-C(78)-H(78)   | 120.0 |
| C(79)-C(78)-C(77)   | 120.0 |
| C(79)-C(78)-H(78)   | 120.0 |
| C(78)-C(79)-H(79)   | 120.0 |
| C(78)-C(79)-C(80)   | 120.0 |
| C(80)-C(79)-H(79)   | 120.0 |
| C(75)-C(80)-H(80)   | 120.0 |
| C(79)-C(80)-C(75)   | 120.0 |
| C(79)-C(80)-H(80)   | 120.0 |
| S(11)-C(81)-H(81A)  | 108.9 |
| S(11)-C(81)-H(81B)  | 108.9 |
| H(81A)-C(81)-H(81B) | 107.7 |

---

|                     |       |
|---------------------|-------|
| C(82)-C(81)-S(11)   | 113.6 |
| C(82)-C(81)-H(81A)  | 108.9 |
| C(82)-C(81)-H(81B)  | 108.9 |
| C(81)-C(82)-H(82A)  | 109.8 |
| C(81)-C(82)-H(82B)  | 109.8 |
| C(81)-C(82)-C(83)   | 109.5 |
| H(82A)-C(82)-H(82B) | 108.2 |
| C(83)-C(82)-H(82A)  | 109.8 |
| C(83)-C(82)-H(82B)  | 109.8 |
| C(88)-C(83)-C(82)   | 119.9 |
| C(88)-C(83)-C(84)   | 120.0 |
| C(84)-C(83)-C(82)   | 120.1 |
| C(83)-C(88)-H(88)   | 120.0 |
| C(87)-C(88)-C(83)   | 120.0 |
| C(87)-C(88)-H(88)   | 120.0 |
| C(88)-C(87)-H(87)   | 120.0 |
| C(86)-C(87)-C(88)   | 120.0 |
| C(86)-C(87)-H(87)   | 120.0 |
| C(87)-C(86)-H(86)   | 120.0 |
| C(85)-C(86)-C(87)   | 120.0 |
| C(85)-C(86)-H(86)   | 120.0 |
| C(86)-C(85)-H(85)   | 120.0 |
| C(86)-C(85)-C(84)   | 120.0 |
| C(84)-C(85)-H(85)   | 120.0 |
| C(83)-C(84)-H(84)   | 120.0 |
| C(85)-C(84)-C(83)   | 120.0 |
| C(85)-C(84)-H(84)   | 120.0 |
| S(12)-C(89)-H(89A)  | 107.5 |
| S(12)-C(89)-H(89B)  | 107.5 |
| H(89A)-C(89)-H(89B) | 107.0 |
| C(90)-C(89)-S(12)   | 119.1 |
| C(90)-C(89)-H(89A)  | 107.5 |
| C(90)-C(89)-H(89B)  | 107.5 |
| C(89)-C(90)-H(90A)  | 107.8 |
| C(89)-C(90)-H(90B)  | 107.8 |
| H(90A)-C(90)-H(90B) | 107.1 |
| C(91)-C(90)-C(89)   | 118.2 |
| C(91)-C(90)-H(90A)  | 107.8 |

---

|                      |       |
|----------------------|-------|
| C(91)-C(90)-H(90B)   | 107.8 |
| C(92)-C(91)-C(90)    | 103.2 |
| C(92)-C(91)-C(96)    | 120.0 |
| C(96)-C(91)-C(90)    | 136.8 |
| C(91)-C(92)-H(92)    | 120.0 |
| C(93)-C(92)-C(91)    | 120.0 |
| C(93)-C(92)-H(92)    | 120.0 |
| C(92)-C(93)-H(93)    | 120.0 |
| C(92)-C(93)-C(94)    | 120.0 |
| C(94)-C(93)-H(93)    | 120.0 |
| C(93)-C(94)-H(94)    | 120.0 |
| C(95)-C(94)-C(93)    | 120.0 |
| C(95)-C(94)-H(94)    | 120.0 |
| C(94)-C(95)-H(95)    | 120.0 |
| C(96)-C(95)-C(94)    | 120.0 |
| C(96)-C(95)-H(95)    | 120.0 |
| C(91)-C(96)-H(96)    | 120.0 |
| C(95)-C(96)-C(91)    | 120.0 |
| C(95)-C(96)-H(96)    | 120.0 |
| C(98)-C(97)-S(13)    | 176.4 |
| C(97)-C(98)-C(99)    | 166.9 |
| C(100)-C(99)-C(98)   | 138.1 |
| C(100)-C(99)-C(104)  | 120.0 |
| C(104)-C(99)-C(98)   | 97.6  |
| C(99)-C(100)-C(101)  | 120.0 |
| C(102)-C(101)-C(100) | 120.0 |
| C(103)-C(102)-C(101) | 120.0 |
| C(104)-C(103)-C(102) | 120.0 |
| C(103)-C(104)-C(99)  | 120.0 |
| S(14)-C(105)-H(10A)  | 101.2 |
| S(14)-C(105)-H(10B)  | 101.2 |
| H(10A)-C(105)-H(10B) | 104.5 |
| C(106)-C(105)-S(14)  | 143.1 |
| C(106)-C(105)-H(10A) | 101.2 |
| C(106)-C(105)-H(10B) | 101.2 |
| C(105)-C(106)-C(107) | 105.9 |
| C(108)-C(107)-C(106) | 104.8 |
| C(108)-C(107)-C(112) | 120.0 |

---

|                      |       |
|----------------------|-------|
| C(112)-C(107)-C(106) | 131.5 |
| C(107)-C(108)-H(108) | 120.0 |
| C(109)-C(108)-C(107) | 120.0 |
| C(109)-C(108)-H(108) | 120.0 |
| C(108)-C(109)-H(109) | 120.0 |
| C(108)-C(109)-C(110) | 120.0 |
| C(110)-C(109)-H(109) | 120.0 |
| C(109)-C(110)-H(110) | 120.0 |
| C(111)-C(110)-C(109) | 120.0 |
| C(111)-C(110)-H(110) | 120.0 |
| C(110)-C(111)-H(111) | 120.0 |
| C(110)-C(111)-C(112) | 120.0 |
| C(112)-C(111)-H(111) | 120.0 |
| C(107)-C(112)-H(112) | 120.0 |
| C(111)-C(112)-C(107) | 120.0 |
| C(111)-C(112)-H(112) | 120.0 |
| S(15)-C(113)-H(11A)  | 113.3 |
| S(15)-C(113)-H(11B)  | 113.3 |
| H(11A)-C(113)-H(11B) | 110.7 |
| C(114)-C(113)-S(15)  | 91.7  |
| C(114)-C(113)-H(11A) | 113.3 |
| C(114)-C(113)-H(11B) | 113.3 |
| C(113)-C(114)-H(11C) | 110.3 |
| C(113)-C(114)-H(11D) | 110.3 |
| H(11C)-C(114)-H(11D) | 108.6 |
| C(115)-C(114)-C(113) | 107.1 |
| C(115)-C(114)-H(11C) | 110.3 |
| C(115)-C(114)-H(11D) | 110.3 |
| C(120)-C(115)-C(114) | 106.8 |
| C(120)-C(115)-C(116) | 120.0 |
| C(116)-C(115)-C(114) | 133.2 |
| C(119)-C(120)-C(115) | 120.0 |
| C(118)-C(119)-C(120) | 120.0 |
| C(117)-C(118)-C(119) | 120.0 |
| C(118)-C(117)-C(116) | 120.0 |
| C(117)-C(116)-C(115) | 120.0 |
| S(16)-C(121)-H(12A)  | 112.3 |
| S(16)-C(121)-H(12B)  | 112.3 |

---

|                      |       |
|----------------------|-------|
| H(12A)-C(121)-H(12B) | 109.9 |
| C(122)-C(121)-S(16)  | 97.4  |
| C(122)-C(121)-H(12A) | 112.3 |
| C(122)-C(121)-H(12B) | 112.3 |
| C(121)-C(122)-H(12C) | 112.7 |
| C(121)-C(122)-H(12D) | 112.7 |
| H(12C)-C(122)-H(12D) | 110.2 |
| C(123)-C(122)-C(121) | 95.2  |
| C(123)-C(122)-H(12C) | 112.7 |
| C(123)-C(122)-H(12D) | 112.7 |
| C(128)-C(123)-C(122) | 119.5 |
| C(128)-C(123)-C(124) | 120.0 |
| C(124)-C(123)-C(122) | 120.5 |
| C(127)-C(128)-C(123) | 120.0 |
| C(126)-C(127)-C(128) | 120.0 |
| C(125)-C(126)-C(127) | 120.0 |
| C(126)-C(125)-C(124) | 120.0 |
| C(125)-C(124)-C(123) | 120.0 |

---

Table 4. Anisotropic displacement parameters ( $\text{\AA}^2 \times 10^3$ ) for  $\text{Au}_{52}(\text{PET})_{32}$ . The anisotropic displacement factor exponent takes the form:  $-2\pi^2[h^2 a^{*2}U^{11} + \dots + 2 h k a^* b^* U^{12}]$

|        | $U^{11}$ | $U^{22}$ | $U^{33}$ | $U^{23}$ | $U^{13}$ | $U^{12}$ |
|--------|----------|----------|----------|----------|----------|----------|
| Au(1)  | 46(1)    | 45(1)    | 44(1)    | 19(1)    | 3(1)     | 6(1)     |
| Au(2)  | 52(1)    | 46(1)    | 58(1)    | 21(1)    | 7(1)     | 4(1)     |
| Au(3)  | 58(1)    | 48(1)    | 61(1)    | 21(1)    | 12(1)    | 10(1)    |
| Au(4)  | 53(1)    | 47(1)    | 54(1)    | 17(1)    | 6(1)     | 6(1)     |
| Au(5)  | 57(1)    | 63(1)    | 46(1)    | 25(1)    | 5(1)     | 8(1)     |
| Au(6)  | 64(1)    | 65(1)    | 52(1)    | 28(1)    | 5(1)     | 8(1)     |
| Au(7)  | 53(1)    | 52(1)    | 59(1)    | 22(1)    | 7(1)     | 5(1)     |
| Au(8)  | 42(1)    | 38(1)    | 41(1)    | 19(1)    | 3(1)     | 5(1)     |
| Au(9)  | 41(1)    | 44(1)    | 40(1)    | 23(1)    | 5(1)     | 7(1)     |
| Au(10) | 74(1)    | 77(1)    | 85(1)    | 47(1)    | 19(1)    | 12(1)    |
| Au(11) | 51(1)    | 52(1)    | 54(1)    | 27(1)    | 10(1)    | 10(1)    |
| Au(12) | 62(1)    | 50(1)    | 64(1)    | 22(1)    | 12(1)    | 6(1)     |
| Au(13) | 47(1)    | 44(1)    | 48(1)    | 20(1)    | 5(1)     | 6(1)     |
| Au(14) | 42(1)    | 40(1)    | 40(1)    | 21(1)    | 7(1)     | 7(1)     |
| Au(15) | 58(1)    | 46(1)    | 51(1)    | 26(1)    | 9(1)     | 10(1)    |
| Au(16) | 54(1)    | 50(1)    | 58(1)    | 22(1)    | 12(1)    | 5(1)     |
| Au(17) | 80(1)    | 65(1)    | 70(1)    | 29(1)    | 19(1)    | 15(1)    |
| Au(18) | 70(1)    | 72(1)    | 66(1)    | 21(1)    | 7(1)     | 11(1)    |
| Au(19) | 83(1)    | 61(1)    | 100(1)   | 41(1)    | 10(1)    | 4(1)     |
| Au(20) | 84(1)    | 69(1)    | 97(1)    | 45(1)    | 26(1)    | 16(1)    |
| Au(21) | 65(1)    | 58(1)    | 55(1)    | 30(1)    | 11(1)    | 10(1)    |
| Au(22) | 71(1)    | 67(1)    | 56(1)    | 16(1)    | -1(1)    | 7(1)     |
| Au(23) | 65(1)    | 59(1)    | 74(1)    | 13(1)    | 4(1)     | 9(1)     |
| Au(24) | 71(1)    | 80(1)    | 65(1)    | 8(1)     | -3(1)    | 14(1)    |
| Au(25) | 74(1)    | 84(1)    | 94(1)    | 47(1)    | -1(1)    | 13(1)    |
| Au(26) | 90(2)    | 108(2)   | 94(2)    | 34(1)    | -13(1)   | 18(1)    |
| S(1)   | 85(5)    | 85(5)    | 84(5)    | 40(4)    | 22(4)    | 7(4)     |
| S(2)   | 118(7)   | 122(6)   | 116(6)   | 62(5)    | 15(5)    | 30(5)    |
| S(3)   | 78(5)    | 75(5)    | 72(5)    | 32(4)    | 9(4)     | 12(4)    |
| S(4)   | 103(6)   | 104(6)   | 102(6)   | 39(5)    | 16(5)    | 21(5)    |
| S(5)   | 126(7)   | 104(6)   | 128(6)   | 75(5)    | 25(5)    | 27(5)    |
| S(6)   | 115(7)   | 106(6)   | 123(6)   | 62(5)    | 27(5)    | 9(5)     |
| S(7)   | 174(8)   | 159(8)   | 155(8)   | 94(7)    | 32(6)    | 5(6)     |

---

|       |        |        |        |       |       |       |
|-------|--------|--------|--------|-------|-------|-------|
| S(8)  | 71(5)  | 76(5)  | 87(5)  | 32(4) | 13(4) | 6(4)  |
| S(9)  | 60(5)  | 66(4)  | 70(4)  | 29(4) | 8(4)  | 14(4) |
| S(10) | 60(4)  | 63(4)  | 66(4)  | 30(3) | 8(4)  | 8(4)  |
| S(11) | 80(5)  | 79(5)  | 85(5)  | 50(4) | 4(4)  | 21(4) |
| S(12) | 80(5)  | 83(5)  | 88(5)  | 52(4) | 20(4) | 7(4)  |
| S(13) | 119(7) | 122(6) | 110(6) | 77(5) | 28(5) | 13(5) |
| S(14) | 115(7) | 121(6) | 103(6) | 46(5) | 21(5) | 18(5) |
| S(15) | 140(8) | 148(7) | 137(7) | 67(6) | 17(6) | 27(6) |
| S(16) | 138(8) | 141(7) | 150(7) | 79(6) | 18(6) | 28(6) |
| C(1)  | 93(5)  | 92(5)  | 93(5)  | 42(3) | 17(4) | 10(4) |
| C(2)  | 100(5) | 100(5) | 101(5) | 45(3) | 16(3) | 13(3) |
| C(3)  | 106(5) | 106(5) | 106(5) | 48(3) | 17(3) | 14(3) |
| C(8)  | 109(6) | 109(6) | 109(6) | 50(4) | 17(3) | 14(3) |
| C(7)  | 111(6) | 111(6) | 112(6) | 51(4) | 17(3) | 15(3) |
| C(6)  | 112(6) | 112(6) | 112(6) | 51(4) | 17(3) | 15(3) |
| C(5)  | 111(6) | 111(6) | 111(6) | 51(4) | 17(3) | 15(3) |
| C(4)  | 109(6) | 109(6) | 109(6) | 50(4) | 17(3) | 15(3) |
| C(9)  | 128(6) | 130(6) | 128(6) | 60(4) | 18(4) | 24(4) |
| C(10) | 137(6) | 138(6) | 137(6) | 63(4) | 21(3) | 22(3) |
| C(12) | 148(7) | 148(7) | 148(7) | 67(4) | 22(3) | 21(3) |
| C(13) | 150(7) | 150(7) | 150(7) | 68(4) | 22(4) | 21(4) |
| C(14) | 150(7) | 151(7) | 151(7) | 68(4) | 22(4) | 22(4) |
| C(15) | 150(7) | 150(7) | 150(7) | 68(4) | 22(4) | 22(4) |
| C(16) | 148(7) | 148(7) | 147(7) | 67(4) | 22(3) | 21(3) |
| C(11) | 145(6) | 145(6) | 144(6) | 66(4) | 22(3) | 22(3) |
| C(17) | 85(5)  | 84(5)  | 83(5)  | 37(3) | 11(3) | 13(3) |
| C(18) | 94(5)  | 93(5)  | 93(5)  | 41(3) | 14(3) | 14(3) |
| C(19) | 101(5) | 101(5) | 101(5) | 45(3) | 16(3) | 15(3) |
| C(20) | 104(6) | 104(5) | 104(5) | 46(4) | 16(3) | 14(3) |
| C(21) | 106(6) | 107(6) | 106(6) | 47(4) | 16(3) | 15(3) |
| C(22) | 107(6) | 107(6) | 107(6) | 47(4) | 17(3) | 15(3) |
| C(23) | 107(6) | 107(6) | 107(6) | 47(4) | 17(3) | 15(3) |
| C(24) | 104(6) | 105(5) | 104(5) | 46(4) | 16(3) | 15(3) |
| C(25) | 110(5) | 111(5) | 110(5) | 48(4) | 17(4) | 19(4) |
| C(26) | 119(6) | 119(6) | 119(6) | 53(4) | 18(3) | 18(3) |
| C(27) | 126(6) | 126(6) | 126(6) | 56(3) | 19(3) | 19(3) |
| C(32) | 130(6) | 130(6) | 130(6) | 58(4) | 19(3) | 19(3) |
| C(31) | 132(6) | 132(6) | 131(6) | 59(4) | 19(3) | 19(3) |



---

|       |        |        |        |       |       |       |
|-------|--------|--------|--------|-------|-------|-------|
| C(30) | 132(7) | 132(6) | 132(7) | 59(4) | 19(4) | 19(3) |
| C(29) | 131(6) | 131(6) | 131(6) | 59(4) | 19(3) | 19(3) |
| C(28) | 129(6) | 129(6) | 129(6) | 58(4) | 19(3) | 19(3) |
| C(33) | 135(6) | 129(6) | 138(6) | 65(4) | 22(4) | 23(4) |
| C(34) | 145(6) | 143(6) | 147(6) | 66(4) | 21(3) | 23(3) |
| C(35) | 153(6) | 152(6) | 154(6) | 69(4) | 22(3) | 23(3) |
| C(40) | 157(7) | 156(7) | 157(7) | 71(4) | 23(3) | 23(3) |
| C(39) | 159(7) | 158(7) | 158(7) | 72(4) | 23(4) | 24(4) |
| C(38) | 159(7) | 159(7) | 159(7) | 72(4) | 23(4) | 24(4) |
| C(37) | 158(7) | 158(7) | 159(7) | 72(4) | 23(4) | 23(4) |
| C(36) | 157(7) | 156(7) | 157(7) | 71(4) | 22(3) | 23(3) |
| C(41) | 124(6) | 121(6) | 127(6) | 59(4) | 23(4) | 15(4) |
| C(42) | 131(6) | 131(6) | 132(6) | 60(4) | 21(3) | 18(3) |
| C(48) | 139(7) | 139(6) | 140(6) | 63(4) | 20(3) | 21(3) |
| C(47) | 140(7) | 141(7) | 140(7) | 64(4) | 21(4) | 22(3) |
| C(46) | 141(7) | 142(7) | 141(7) | 64(4) | 21(4) | 21(4) |
| C(45) | 140(7) | 141(7) | 140(7) | 64(4) | 21(4) | 21(3) |
| C(44) | 139(7) | 139(6) | 139(6) | 63(4) | 21(3) | 21(3) |
| C(43) | 137(6) | 137(6) | 137(6) | 62(4) | 21(3) | 20(3) |
| C(49) | 173(8) | 168(7) | 167(7) | 83(5) | 28(4) | 17(4) |
| C(50) | 175(8) | 173(7) | 173(8) | 81(4) | 27(4) | 22(4) |
| C(52) | 178(8) | 178(8) | 178(8) | 81(4) | 26(4) | 25(4) |
| C(53) | 178(8) | 178(8) | 178(8) | 82(4) | 26(4) | 26(4) |
| C(54) | 178(8) | 179(8) | 178(8) | 81(5) | 27(4) | 26(4) |
| C(55) | 178(8) | 179(8) | 178(8) | 82(4) | 27(4) | 26(4) |
| C(56) | 178(8) | 178(8) | 177(8) | 81(4) | 27(4) | 26(4) |
| C(51) | 177(8) | 177(8) | 176(8) | 81(4) | 27(3) | 25(3) |
| C(57) | 85(5)  | 86(5)  | 91(5)  | 39(3) | 14(4) | 10(3) |
| C(58) | 95(5)  | 96(5)  | 99(5)  | 43(3) | 16(3) | 13(3) |
| C(59) | 104(5) | 104(5) | 107(5) | 47(3) | 16(3) | 15(3) |
| C(60) | 108(6) | 108(6) | 110(6) | 49(4) | 18(3) | 15(3) |
| C(61) | 111(6) | 111(6) | 112(6) | 50(4) | 18(3) | 16(3) |
| C(62) | 112(6) | 113(6) | 113(6) | 50(4) | 17(3) | 17(3) |
| C(63) | 111(6) | 112(6) | 113(6) | 50(4) | 17(3) | 16(3) |
| C(64) | 108(6) | 109(6) | 111(6) | 48(4) | 16(3) | 16(3) |
| C(65) | 68(4)  | 70(4)  | 71(4)  | 31(3) | 10(3) | 12(3) |
| C(66) | 73(5)  | 74(4)  | 75(4)  | 32(3) | 12(3) | 11(3) |
| C(67) | 78(5)  | 79(4)  | 79(4)  | 35(3) | 13(3) | 12(3) |

---

|        |        |        |        |       |       |       |
|--------|--------|--------|--------|-------|-------|-------|
| C(72)  | 82(5)  | 82(5)  | 82(5)  | 36(3) | 14(3) | 12(3) |
| C(71)  | 83(5)  | 83(5)  | 83(5)  | 37(3) | 13(3) | 11(3) |
| C(70)  | 82(5)  | 83(5)  | 83(5)  | 37(3) | 14(3) | 11(3) |
| C(69)  | 81(5)  | 82(5)  | 82(5)  | 37(3) | 13(3) | 11(3) |
| C(68)  | 80(5)  | 81(5)  | 80(5)  | 36(3) | 13(3) | 12(3) |
| C(73)  | 66(4)  | 66(4)  | 68(4)  | 32(3) | 11(3) | 7(3)  |
| C(74)  | 71(4)  | 71(4)  | 73(4)  | 32(3) | 12(3) | 10(3) |
| C(75)  | 76(4)  | 76(4)  | 78(4)  | 35(3) | 12(3) | 11(3) |
| C(76)  | 78(5)  | 79(5)  | 79(5)  | 35(3) | 12(3) | 12(3) |
| C(77)  | 80(5)  | 80(5)  | 81(5)  | 37(3) | 12(3) | 11(3) |
| C(78)  | 81(5)  | 83(5)  | 82(5)  | 36(3) | 13(3) | 12(3) |
| C(79)  | 80(5)  | 82(5)  | 82(5)  | 36(3) | 13(3) | 11(3) |
| C(80)  | 78(5)  | 80(5)  | 79(5)  | 36(3) | 13(3) | 11(3) |
| C(81)  | 85(5)  | 84(5)  | 87(5)  | 42(3) | 9(3)  | 16(3) |
| C(82)  | 88(5)  | 88(5)  | 89(5)  | 42(3) | 11(3) | 14(3) |
| C(83)  | 91(5)  | 91(5)  | 92(5)  | 42(3) | 14(3) | 14(3) |
| C(88)  | 93(5)  | 93(5)  | 94(5)  | 43(3) | 14(3) | 14(3) |
| C(87)  | 95(6)  | 95(5)  | 96(5)  | 43(4) | 14(3) | 14(3) |
| C(86)  | 96(6)  | 96(6)  | 96(6)  | 44(4) | 14(3) | 14(3) |
| C(85)  | 95(6)  | 96(5)  | 96(5)  | 43(4) | 15(3) | 14(3) |
| C(84)  | 93(5)  | 94(5)  | 94(5)  | 43(3) | 14(3) | 14(3) |
| C(89)  | 89(5)  | 91(5)  | 92(5)  | 46(3) | 16(4) | 11(3) |
| C(90)  | 97(5)  | 98(5)  | 98(5)  | 46(3) | 16(3) | 13(3) |
| C(91)  | 103(5) | 102(5) | 104(5) | 48(3) | 15(3) | 14(3) |
| C(92)  | 106(6) | 106(6) | 106(6) | 49(4) | 16(3) | 14(3) |
| C(93)  | 108(6) | 108(6) | 108(6) | 49(4) | 16(3) | 15(3) |
| C(94)  | 108(6) | 108(6) | 108(6) | 50(4) | 15(3) | 16(3) |
| C(95)  | 107(6) | 107(6) | 107(6) | 50(4) | 15(3) | 15(3) |
| C(96)  | 106(6) | 105(6) | 106(6) | 49(4) | 15(3) | 15(3) |
| C(97)  | 130(6) | 133(6) | 128(6) | 65(4) | 23(4) | 17(4) |
| C(98)  | 138(6) | 140(6) | 138(6) | 65(4) | 21(3) | 19(3) |
| C(99)  | 146(6) | 146(6) | 147(6) | 67(4) | 22(3) | 21(3) |
| C(100) | 149(7) | 150(7) | 150(7) | 68(4) | 22(3) | 21(3) |
| C(101) | 151(7) | 152(7) | 152(7) | 69(4) | 23(4) | 22(4) |
| C(102) | 152(7) | 152(7) | 152(7) | 69(4) | 22(4) | 22(4) |
| C(103) | 151(7) | 152(7) | 152(7) | 69(4) | 22(4) | 22(4) |
| C(104) | 149(7) | 150(7) | 150(7) | 68(4) | 22(3) | 22(3) |
| C(105) | 122(6) | 125(6) | 118(6) | 54(4) | 20(4) | 18(4) |

---

|        |        |        |        |       |       |       |
|--------|--------|--------|--------|-------|-------|-------|
| C(106) | 130(6) | 131(6) | 129(6) | 58(4) | 20(3) | 19(3) |
| C(107) | 136(6) | 137(6) | 137(6) | 61(4) | 21(3) | 20(3) |
| C(108) | 139(7) | 140(7) | 139(7) | 62(4) | 22(3) | 20(3) |
| C(109) | 140(7) | 141(7) | 141(7) | 63(4) | 22(4) | 21(4) |
| C(110) | 141(7) | 141(7) | 142(7) | 64(4) | 21(4) | 21(4) |
| C(111) | 140(7) | 141(7) | 142(7) | 63(4) | 21(4) | 21(4) |
| C(112) | 139(7) | 140(7) | 140(7) | 63(4) | 21(3) | 21(3) |
| C(113) | 148(7) | 152(7) | 148(7) | 69(4) | 20(4) | 24(4) |
| C(114) | 157(7) | 158(7) | 157(7) | 72(4) | 23(4) | 24(4) |
| C(115) | 163(7) | 164(7) | 164(7) | 74(4) | 24(3) | 24(3) |
| C(120) | 166(7) | 167(7) | 167(7) | 75(4) | 25(4) | 24(3) |
| C(119) | 168(8) | 168(8) | 169(8) | 76(4) | 25(4) | 25(4) |
| C(118) | 169(8) | 169(8) | 169(8) | 76(4) | 25(4) | 25(4) |
| C(117) | 168(8) | 168(8) | 168(8) | 76(4) | 25(4) | 25(4) |
| C(116) | 166(7) | 166(7) | 167(7) | 76(4) | 25(4) | 24(3) |
| C(121) | 151(7) | 152(7) | 156(7) | 73(4) | 21(4) | 25(4) |
| C(122) | 159(7) | 161(7) | 161(7) | 74(4) | 23(4) | 24(4) |
| C(123) | 166(7) | 167(7) | 166(7) | 76(4) | 24(3) | 25(3) |
| C(128) | 169(8) | 169(7) | 169(7) | 77(4) | 25(4) | 24(4) |
| C(127) | 170(8) | 171(8) | 171(8) | 78(4) | 26(4) | 25(4) |
| C(126) | 171(8) | 171(8) | 171(8) | 78(4) | 26(4) | 25(4) |
| C(125) | 170(8) | 171(8) | 171(8) | 78(4) | 25(4) | 25(4) |
| C(124) | 169(8) | 169(7) | 169(7) | 77(4) | 25(4) | 25(4) |

---

Table 5. Hydrogen coordinates ( $\times 10^4$ ) and isotropic displacement parameters ( $\text{\AA}^2 \times 10^3$ ) for  $\text{Au}_{52}(\text{PET})_{32}$ .

|        | x     | y     | z     | U(eq) |
|--------|-------|-------|-------|-------|
| H(1A)  | 8017  | 6050  | 3142  | 111   |
| H(1B)  | 8489  | 6464  | 3906  | 111   |
| H(2A)  | 8877  | 5179  | 2788  | 121   |
| H(2B)  | 9363  | 5741  | 3515  | 121   |
| H(8)   | 9823  | 6977  | 3744  | 131   |
| H(7)   | 10316 | 7787  | 3328  | 134   |
| H(6)   | 10143 | 7427  | 2118  | 135   |
| H(5)   | 9477  | 6256  | 1324  | 133   |
| H(4)   | 8984  | 5446  | 1741  | 131   |
| H(9A)  | 7068  | 2765  | 955   | 153   |
| H(9B)  | 7435  | 3464  | 892   | 153   |
| H(17A) | 5083  | 1247  | 1513  | 102   |
| H(17B) | 5847  | 1050  | 1326  | 102   |
| H(18A) | 5923  | 484   | 2092  | 113   |
| H(18B) | 5155  | 684   | 2283  | 113   |
| H(20)  | 4120  | -193  | 1500  | 126   |
| H(21)  | 3674  | -1375 | 541   | 129   |
| H(22)  | 4413  | -2045 | -258  | 129   |
| H(23)  | 5597  | -1532 | -98   | 129   |
| H(24)  | 6043  | -349  | 860   | 126   |
| H(32)  | 2902  | 884   | -529  | 156   |
| H(31)  | 2193  | 175   | -1629 | 159   |
| H(30)  | 1753  | -1100 | -2004 | 159   |
| H(29)  | 2021  | -1668 | -1279 | 158   |
| H(28)  | 2730  | -960  | -179  | 155   |
| H(33A) | 3180  | 502   | 3017  | 159   |
| H(33B) | 3819  | 82    | 3108  | 159   |
| H(41A) | 1410  | 1962  | 5694  | 148   |
| H(41B) | 1368  | 1318  | 4886  | 148   |
| H(49A) | 4367  | 4578  | 8360  | 201   |
| H(49B) | 3519  | 4557  | 8315  | 201   |
| H(50A) | 3901  | 3110  | 7859  | 208   |
| H(50B) | 3386  | 3496  | 8431  | 208   |

---

|        |       |       |       |     |
|--------|-------|-------|-------|-----|
| H(52)  | 4413  | 4763  | 9735  | 214 |
| H(53)  | 5403  | 4719  | 10434 | 214 |
| H(54)  | 6024  | 3682  | 9994  | 214 |
| H(55)  | 5655  | 2688  | 8855  | 214 |
| H(56)  | 4665  | 2732  | 8155  | 213 |
| H(57A) | 2092  | 1336  | 3376  | 106 |
| H(57B) | 1452  | 1773  | 3691  | 106 |
| H(58A) | 1494  | 777   | 2246  | 117 |
| H(58B) | 905   | 1328  | 2469  | 117 |
| H(60)  | 83    | 1157  | 3310  | 131 |
| H(61)  | -583  | 252   | 3513  | 134 |
| H(62)  | -302  | -983  | 3080  | 136 |
| H(63)  | 645   | -1312 | 2446  | 135 |
| H(64)  | 1311  | -407  | 2243  | 132 |
| H(65A) | 1043  | 3417  | 3875  | 84  |
| H(65B) | 1608  | 3710  | 4574  | 84  |
| H(72)  | 607   | 2690  | 4308  | 99  |
| H(71)  | -202  | 1843  | 4457  | 100 |
| H(70)  | -1072 | 2300  | 5172  | 100 |
| H(69)  | -1134 | 3603  | 5737  | 99  |
| H(68)  | -325  | 4450  | 5588  | 97  |
| H(73A) | 2265  | 6229  | 6745  | 80  |
| H(73B) | 2563  | 7114  | 7082  | 80  |
| H(76)  | 1126  | 8039  | 6985  | 95  |
| H(77)  | 156   | 8177  | 7592  | 96  |
| H(78)  | -430  | 7129  | 7650  | 99  |
| H(79)  | -45   | 5944  | 7102  | 98  |
| H(80)  | 925   | 5807  | 6495  | 95  |
| H(81A) | 2326  | 7356  | 4549  | 101 |
| H(81B) | 2476  | 6930  | 5017  | 101 |
| H(82A) | 3459  | 8112  | 5036  | 105 |
| H(82B) | 3599  | 7690  | 5512  | 105 |
| H(88)  | 3253  | 8211  | 6647  | 112 |
| H(87)  | 2714  | 9110  | 7522  | 115 |
| H(86)  | 1987  | 9850  | 7239  | 115 |
| H(85)  | 1800  | 9690  | 6083  | 115 |
| H(84)  | 2338  | 8791  | 5209  | 113 |
| H(89A) | 5781  | 8277  | 4632  | 107 |

---

|        |      |       |      |     |
|--------|------|-------|------|-----|
| H(89B) | 5606 | 7668  | 3821 | 107 |
| H(90A) | 4448 | 8116  | 3866 | 117 |
| H(90B) | 4824 | 8827  | 4579 | 117 |
| H(92)  | 5466 | 9674  | 4704 | 128 |
| H(93)  | 5979 | 10568 | 4390 | 130 |
| H(94)  | 5963 | 10260 | 3199 | 129 |
| H(95)  | 5434 | 9059  | 2320 | 128 |
| H(96)  | 4921 | 8164  | 2634 | 127 |
| H(10A) | 3654 | 2930  | 551  | 147 |
| H(10B) | 3572 | 3646  | 1245 | 147 |
| H(108) | 2698 | 4416  | 357  | 168 |
| H(109) | 1502 | 3909  | -38  | 170 |
| H(110) | 1168 | 2595  | -701 | 170 |
| H(111) | 2030 | 1788  | -970 | 170 |
| H(112) | 3226 | 2294  | -575 | 168 |
| H(11A) | 1761 | 1381  | 1136 | 179 |
| H(11B) | 1206 | 1941  | 1540 | 179 |
| H(11C) | 753  | 2006  | 537  | 189 |
| H(11D) | 1478 | 1850  | 214  | 189 |
| H(12A) | 250  | 5235  | 2151 | 183 |
| H(12B) | 372  | 5626  | 3006 | 183 |
| H(12C) | 1012 | 6605  | 2857 | 193 |
| H(12D) | 1637 | 6094  | 2814 | 193 |

---

Table 6. Torsion angles [°] for Au<sub>52</sub>(PET)<sub>32</sub>.

|                            |        |
|----------------------------|--------|
| Au(2)-S(8)-C(57)-C(58)     | -173.4 |
| Au(3)-S(5)-C(33)-C(34)     | -133.8 |
| Au(4)-S(3)-C(17)-C(18)     | -88.3  |
| Au(5)-S(14)-C(105)-C(106)  | 91.7   |
| Au(7)-S(9)-C(65)-C(66)     | 166.7  |
| Au(10)-S(12)-C(89)-C(90)   | 82.9   |
| Au(11)-S(11)-C(81)-C(82)   | 75.6   |
| Au(12)-S(9)-C(65)-C(66)    | 77.7   |
| Au(12)-S(10)-C(73)-C(74)   | -55.2  |
| Au(13)-S(10)-C(73)-C(74)   | -155.9 |
| Au(15)-S(12)-C(89)-C(90)   | -178.2 |
| Au(16)-S(1)-C(1)-C(2)      | 171.3  |
| Au(17)-S(1)-C(1)-C(2)      | -91.5  |
| Au(17)-S(2)-C(9)-C(10)     | 13.3   |
| Au(18)-S(2)-C(9)-C(10)     | -73.1  |
| Au(18)-S(3)-C(17)-C(18)    | 172.9  |
| Au(19)-S(5)-C(33)-C(34)    | -45.8  |
| Au(19)-S(6)-C(41)-C(42)    | 46.8   |
| Au(20)-S(6)-C(41)-C(42)    | -56.3  |
| Au(20)-S(7)-C(49)-C(50)    | 73.6   |
| Au(21)-S(7)-C(49)-C(50)    | -164.7 |
| Au(22)-S(15)-C(113)-C(114) | -179.8 |
| Au(23)-S(4)-C(25)-C(26)    | 149.6  |
| Au(23)-S(8)-C(57)-C(58)    | -78.0  |
| Au(24)-S(4)-C(25)-C(26)    | 50.5   |
| Au(24)-S(14)-C(105)-C(106) | -173.9 |
| Au(25)-S(11)-C(81)-C(82)   | -175.1 |
| Au(25)-S(16)-C(121)-C(122) | 38.5   |
| Au(26)-S(15)-C(113)-C(114) | 93.1   |
| Au(26)-S(16)-C(121)-C(122) | -103.6 |
| S(1)-C(1)-C(2)-C(3)        | 168.0  |
| S(2)-C(9)-C(10)-C(11)      | -128.8 |
| S(3)-C(17)-C(18)-C(19)     | 179.8  |
| S(4)-C(25)-C(26)-C(27)     | 173.7  |
| S(5)-C(33)-C(34)-C(35)     | -138.4 |
| S(6)-C(41)-C(42)-C(43)     | 116.2  |

---

|                            |        |
|----------------------------|--------|
| S(7)-C(49)-C(50)-C(51)     | 133.8  |
| S(8)-C(57)-C(58)-C(59)     | -166.6 |
| S(9)-C(65)-C(66)-C(67)     | 174.3  |
| S(10)-C(73)-C(74)-C(75)    | 176.1  |
| S(11)-C(81)-C(82)-C(83)    | 179.0  |
| S(12)-C(89)-C(90)-C(91)    | -161.0 |
| S(14)-C(105)-C(106)-C(107) | 149.0  |
| S(15)-C(113)-C(114)-C(115) | 152.2  |
| S(16)-C(121)-C(122)-C(123) | 91.7   |
| C(1)-C(2)-C(3)-C(8)        | 76.1   |
| C(1)-C(2)-C(3)-C(4)        | -96.6  |
| C(2)-C(3)-C(8)-C(7)        | -173.2 |
| C(2)-C(3)-C(4)-C(5)        | 172.2  |
| C(3)-C(8)-C(7)-C(6)        | 0.0    |
| C(8)-C(3)-C(4)-C(5)        | 0.0    |
| C(8)-C(7)-C(6)-C(5)        | 0.0    |
| C(7)-C(6)-C(5)-C(4)        | 0.0    |
| C(6)-C(5)-C(4)-C(3)        | 0.0    |
| C(4)-C(3)-C(8)-C(7)        | 0.0    |
| C(9)-C(10)-C(11)-C(12)     | -132.5 |
| C(9)-C(10)-C(11)-C(16)     | 45.5   |
| C(12)-C(13)-C(14)-C(15)    | 0.0    |
| C(13)-C(12)-C(11)-C(10)    | 177.9  |
| C(13)-C(12)-C(11)-C(16)    | 0.0    |
| C(13)-C(14)-C(15)-C(16)    | 0.0    |
| C(14)-C(15)-C(16)-C(11)    | 0.0    |
| C(15)-C(16)-C(11)-C(10)    | -177.9 |
| C(15)-C(16)-C(11)-C(12)    | 0.0    |
| C(11)-C(12)-C(13)-C(14)    | 0.0    |
| C(17)-C(18)-C(19)-C(20)    | -105.5 |
| C(17)-C(18)-C(19)-C(24)    | 80.4   |
| C(18)-C(19)-C(20)-C(21)    | -174.0 |
| C(18)-C(19)-C(24)-C(23)    | 174.3  |
| C(19)-C(20)-C(21)-C(22)    | 0.0    |
| C(20)-C(19)-C(24)-C(23)    | 0.0    |
| C(20)-C(21)-C(22)-C(23)    | 0.0    |
| C(21)-C(22)-C(23)-C(24)    | 0.0    |
| C(22)-C(23)-C(24)-C(19)    | 0.0    |



---

|                         |        |
|-------------------------|--------|
| C(24)-C(19)-C(20)-C(21) | 0.0    |
| C(25)-C(26)-C(27)-C(32) | 123.2  |
| C(25)-C(26)-C(27)-C(28) | -67.4  |
| C(26)-C(27)-C(32)-C(31) | 171.2  |
| C(26)-C(27)-C(28)-C(29) | -168.2 |
| C(27)-C(32)-C(31)-C(30) | 0.0    |
| C(32)-C(27)-C(28)-C(29) | 0.0    |
| C(32)-C(31)-C(30)-C(29) | 0.0    |
| C(31)-C(30)-C(29)-C(28) | 0.0    |
| C(30)-C(29)-C(28)-C(27) | 0.0    |
| C(28)-C(27)-C(32)-C(31) | 0.0    |
| C(33)-C(34)-C(35)-C(40) | -74.9  |
| C(33)-C(34)-C(35)-C(36) | 102.6  |
| C(34)-C(35)-C(40)-C(39) | 177.3  |
| C(34)-C(35)-C(36)-C(37) | -177.8 |
| C(35)-C(40)-C(39)-C(38) | 0.0    |
| C(40)-C(35)-C(36)-C(37) | 0.0    |
| C(40)-C(39)-C(38)-C(37) | 0.0    |
| C(39)-C(38)-C(37)-C(36) | 0.0    |
| C(38)-C(37)-C(36)-C(35) | 0.0    |
| C(36)-C(35)-C(40)-C(39) | 0.0    |
| C(41)-C(42)-C(43)-C(48) | -158.7 |
| C(41)-C(42)-C(43)-C(44) | -11.6  |
| C(48)-C(47)-C(46)-C(45) | 0.0    |
| C(47)-C(48)-C(43)-C(42) | 149.9  |
| C(47)-C(48)-C(43)-C(44) | 0.0    |
| C(47)-C(46)-C(45)-C(44) | 0.0    |
| C(46)-C(45)-C(44)-C(43) | 0.0    |
| C(45)-C(44)-C(43)-C(42) | -142.6 |
| C(45)-C(44)-C(43)-C(48) | 0.0    |
| C(43)-C(48)-C(47)-C(46) | 0.0    |
| C(49)-C(50)-C(51)-C(52) | 54.6   |
| C(49)-C(50)-C(51)-C(56) | -125.9 |
| C(52)-C(53)-C(54)-C(55) | 0.0    |
| C(53)-C(52)-C(51)-C(50) | 179.5  |
| C(53)-C(52)-C(51)-C(56) | 0.0    |
| C(53)-C(54)-C(55)-C(56) | 0.0    |
| C(54)-C(55)-C(56)-C(51) | 0.0    |

---

|                         |        |
|-------------------------|--------|
| C(55)-C(56)-C(51)-C(50) | -179.7 |
| C(55)-C(56)-C(51)-C(52) | 0.0    |
| C(51)-C(52)-C(53)-C(54) | 0.0    |
| C(57)-C(58)-C(59)-C(60) | 74.8   |
| C(57)-C(58)-C(59)-C(64) | -104.0 |
| C(58)-C(59)-C(60)-C(61) | -178.8 |
| C(58)-C(59)-C(64)-C(63) | 178.8  |
| C(59)-C(60)-C(61)-C(62) | 0.0    |
| C(60)-C(59)-C(64)-C(63) | 0.0    |
| C(60)-C(61)-C(62)-C(63) | 0.0    |
| C(61)-C(62)-C(63)-C(64) | 0.0    |
| C(62)-C(63)-C(64)-C(59) | 0.0    |
| C(64)-C(59)-C(60)-C(61) | 0.0    |
| C(65)-C(66)-C(67)-C(72) | -8.5   |
| C(65)-C(66)-C(67)-C(68) | 178.5  |
| C(66)-C(67)-C(72)-C(71) | -173.0 |
| C(66)-C(67)-C(68)-C(69) | 172.9  |
| C(67)-C(72)-C(71)-C(70) | 0.0    |
| C(72)-C(67)-C(68)-C(69) | 0.0    |
| C(72)-C(71)-C(70)-C(69) | 0.0    |
| C(71)-C(70)-C(69)-C(68) | 0.0    |
| C(70)-C(69)-C(68)-C(67) | 0.0    |
| C(68)-C(67)-C(72)-C(71) | 0.0    |
| C(73)-C(74)-C(75)-C(76) | 109.0  |
| C(73)-C(74)-C(75)-C(80) | -72.6  |
| C(74)-C(75)-C(76)-C(77) | 178.4  |
| C(74)-C(75)-C(80)-C(79) | -178.5 |
| C(75)-C(76)-C(77)-C(78) | 0.0    |
| C(76)-C(75)-C(80)-C(79) | 0.0    |
| C(76)-C(77)-C(78)-C(79) | 0.0    |
| C(77)-C(78)-C(79)-C(80) | 0.0    |
| C(78)-C(79)-C(80)-C(75) | 0.0    |
| C(80)-C(75)-C(76)-C(77) | 0.0    |
| C(81)-C(82)-C(83)-C(88) | 109.7  |
| C(81)-C(82)-C(83)-C(84) | -73.5  |
| C(82)-C(83)-C(88)-C(87) | 176.9  |
| C(82)-C(83)-C(84)-C(85) | -176.9 |
| C(83)-C(88)-C(87)-C(86) | 0.0    |

---

|                             |        |
|-----------------------------|--------|
| C(88)-C(83)-C(84)-C(85)     | 0.0    |
| C(88)-C(87)-C(86)-C(85)     | 0.0    |
| C(87)-C(86)-C(85)-C(84)     | 0.0    |
| C(86)-C(85)-C(84)-C(83)     | 0.0    |
| C(84)-C(83)-C(88)-C(87)     | 0.0    |
| C(89)-C(90)-C(91)-C(92)     | -95.1  |
| C(89)-C(90)-C(91)-C(96)     | 82.6   |
| C(90)-C(91)-C(92)-C(93)     | 178.1  |
| C(90)-C(91)-C(96)-C(95)     | -177.3 |
| C(91)-C(92)-C(93)-C(94)     | 0.0    |
| C(92)-C(91)-C(96)-C(95)     | 0.0    |
| C(92)-C(93)-C(94)-C(95)     | 0.0    |
| C(93)-C(94)-C(95)-C(96)     | 0.0    |
| C(94)-C(95)-C(96)-C(91)     | 0.0    |
| C(96)-C(91)-C(92)-C(93)     | 0.0    |
| C(97)-C(98)-C(99)-C(100)    | -164.1 |
| C(97)-C(98)-C(99)-C(104)    | 41.4   |
| C(98)-C(99)-C(100)-C(101)   | -150.5 |
| C(98)-C(99)-C(104)-C(103)   | 160.6  |
| C(99)-C(100)-C(101)-C(102)  | 0.0    |
| C(100)-C(99)-C(104)-C(103)  | 0.0    |
| C(100)-C(101)-C(102)-C(103) | 0.0    |
| C(101)-C(102)-C(103)-C(104) | 0.0    |
| C(102)-C(103)-C(104)-C(99)  | 0.0    |
| C(104)-C(99)-C(100)-C(101)  | 0.0    |
| C(105)-C(106)-C(107)-C(108) | 118.6  |
| C(105)-C(106)-C(107)-C(112) | -38.8  |
| C(106)-C(107)-C(108)-C(109) | -160.6 |
| C(106)-C(107)-C(112)-C(111) | 154.6  |
| C(107)-C(108)-C(109)-C(110) | 0.0    |
| C(108)-C(107)-C(112)-C(111) | 0.0    |
| C(108)-C(109)-C(110)-C(111) | 0.0    |
| C(109)-C(110)-C(111)-C(112) | 0.0    |
| C(110)-C(111)-C(112)-C(107) | 0.0    |
| C(112)-C(107)-C(108)-C(109) | 0.0    |
| C(113)-C(114)-C(115)-C(120) | 6.3    |
| C(113)-C(114)-C(115)-C(116) | -173.7 |
| C(114)-C(115)-C(120)-C(119) | 180.0  |

---

|                             |        |
|-----------------------------|--------|
| C(114)-C(115)-C(116)-C(117) | -180.0 |
| C(115)-C(120)-C(119)-C(118) | 0.0    |
| C(120)-C(115)-C(116)-C(117) | 0.0    |
| C(120)-C(119)-C(118)-C(117) | 0.0    |
| C(119)-C(118)-C(117)-C(116) | 0.0    |
| C(118)-C(117)-C(116)-C(115) | 0.0    |
| C(116)-C(115)-C(120)-C(119) | 0.0    |
| C(121)-C(122)-C(123)-C(128) | 32.3   |
| C(121)-C(122)-C(123)-C(124) | -145.2 |
| C(122)-C(123)-C(128)-C(127) | -177.5 |
| C(122)-C(123)-C(124)-C(125) | 177.4  |
| C(123)-C(128)-C(127)-C(126) | 0.0    |
| C(128)-C(123)-C(124)-C(125) | 0.0    |
| C(128)-C(127)-C(126)-C(125) | 0.0    |
| C(127)-C(126)-C(125)-C(124) | 0.0    |
| C(126)-C(125)-C(124)-C(123) | 0.0    |
| C(124)-C(123)-C(128)-C(127) | 0.0    |

---
